1 **Oncogene-induced cardiac neoplasia shares similar mechanisms with heart regeneration**  
2 **in zebrafish**

3

4 Catherine Pfefferli, Marylène Bonvin, Steve Robatel, Julien Perler, Désirée König, and Anna  
5 Jazwińska \*

6

7 *Department of Biology, University of Fribourg, Chemin du Musée 10, 1700 Fribourg,*  
8 *Switzerland*

9 \* corresponding author

10 Email: [anna.jazwinska@unifr.ch](mailto:anna.jazwinska@unifr.ch)

11

12 Keywords: zebrafish heart, cardiac tumor, activated HRAS oncogene, dedifferentiation,  
13 epimorphic regeneration, TOR, mitochondria, neoplastic transformation, hyperproliferation

14

15 **Abstract**

16 The human heart is a poorly regenerative organ and cardiac tumors are extremely rare. The  
17 zebrafish heart can restore its damaged myocardium through cardiomyocyte proliferation.  
18 Whether this endogenous capacity causes a susceptibility to neoplasia remains unknown. Here,  
19 we established a strategy to conditionally express the HRAS<sup>G12V</sup> oncogene in zebrafish  
20 cardiomyocytes. The induction of this transgene in larvae or adult animals resulted in heart  
21 overgrowth with abnormal histology. The malformed ventricle displayed similar characteristics  
22 to the regenerative myocardium, such as enhanced cell-cycle entry, incomplete differentiation,  
23 reactivation of cardiac embryonic programs, expression of regeneration genes, oxidative  
24 metabolism changes, intramyocardial matrix remodeling and leucocyte recruitment. We found  
25 that oncogene-mediated cardiac tumorigenesis and cryoinjury-induced regeneration involve  
26 TOR signaling, as visualized by phosphorylation of its target ribosomal protein S6. The  
27 inhibition of TOR by rapamycin impaired regeneration and rescued from neoplasia. These  
28 findings demonstrate the existence of common mechanisms underlying the proliferative  
29 plasticity of zebrafish cardiomyocytes during advantageous organ restoration and detrimental  
30 tumorigenesis.

31

32

33

34

## 35 **Introduction**

36 Epimorphic organ regeneration and tumor formation are somewhat related processes  
37 because they depend on enhanced cell proliferation in a functional body part. Both phenomena  
38 are triggered by a disturbance of tissue homeostasis through the disruption of organ integrity or  
39 genetic aberrations, respectively. The key difference is the opposite outcome for the organism:  
40 The epimorphic regeneration reconstructs the damaged organ, whereas a tumor ruins the organ  
41 architecture. Whether the hyperplastic nature of regenerative-competent and tumorigenic cells  
42 shares other common cellular and molecular mechanisms is still being disputed (Charni et al.,  
43 2017; Milanovic et al., 2018; Oviedo and Beane, 2009; Pomerantz and Blau, 2013; Sarig and  
44 Tzahor, 2017; Stiehl and Marciniak-Czochra, 2017; Wong and Whited, 2020).

45 The susceptibility for oncogenic diseases can substantially vary in different cell types.  
46 Tissues that undergo stem cell-mediated regeneration, such as the blood or epithelia, are more  
47 prone to neoplastic transformation upon exposure to carcinogens or expression of oncogenes,  
48 compared to poorly regenerative tissues (Tomasetti and Vogelstein, 2015). In the adult  
49 mammalian heart, a risk of spontaneous or induced oncogenesis is extremely low, probably due  
50 to a lack of active stem cells and low renewal of functional cardiomyocytes (Cai and Molkenin  
51 Jeffery, 2017; Maleszewski et al., 2017). Consistently, human myocardial tumors are extremely  
52 rare, reported mostly in newborn infants (Freedom et al., 2000; Uzun et al., 2007). This neonatal  
53 pathology is thought to arise from fetal cardiomyocytes which are capable of cell divisions  
54 (Haubner et al., 2016; Mollova et al., 2013). As opposed to mammals, zebrafish increase the  
55 size of their heart during the entire ontogenetic growth mostly through hyperplasia of  
56 cardiomyocytes (González-Rosa et al., 2018; Jaźwińska and Blanchoud, 2020; Pronobis and  
57 Poss, 2020). Despite the persisting hyperplastic capacity even in the adult zebrafish heart,  
58 myocardium-specific tumors have not been described in this popular model organism. One of  
59 the intriguing questions is whether zebrafish cardiomyocytes, which are specialized and  
60 functional cells, yet with a proliferative plasticity, can undergo tumorigenic transformation.

61 Although zebrafish cardiomyocytes can proliferate even at their mature state, they  
62 dedifferentiate during regeneration (González-Rosa et al., 2017; Han et al., 2019; Jopling et al.,  
63 2010; Kikuchi, 2015). In this context, dedifferentiation refers to a process in which specialized  
64 cells transiently acquire the properties of more immature and mitotic cells within the same  
65 lineage hierarchy (Tata and Rajagopal, 2016). In various ventricular injury models, cell lineage  
66 tracing analyses have demonstrated that the new myocardium originates from pre-existing  
67 cardiomyocytes (Jopling et al., 2010; Kikuchi et al., 2010; Pfefferli and Jaźwińska, 2017;  
68 Sánchez-Iranzo et al., 2018; Sande-Melón et al., 2019). In the cryoinjury model, the peri-injury

69 myocardium, which is located in a zone of approx. 100  $\mu\text{m}$  from the lesion site, activates the  
70 regenerative program and contributes to the new myocardium (Pfefferli and Jazwińska, 2017;  
71 Wu et al., 2016). This activated region of the heart comprises cardiomyocytes that undergo  
72 enhanced proliferation and dedifferentiation, whereby embryonic cardiac programs become *de-*  
73 *novo* activated, whereas certain mature sarcomeric structures become downregulated (Fig. S1).  
74 Other associated heart tissues, such as the epicardium, the endocardium, connective tissues,  
75 immune cells and nerves, provide molecular signals and a microenvironment to stimulate or  
76 assist regeneration (Fig. S1) (Sanz-Morejón and Mercader, 2020; Tzahor and Poss, 2017; Uygur  
77 and Lee, 2016). In the cryoinjury model, regeneration is accompanied by a transient fibrotic  
78 tissue deposition, which progressively resolves giving space to the new myocardium (Chablais  
79 et al., 2011; Gonzalez-Rosa et al., 2011; Schnabel et al., 2011). Within one to two months, most  
80 of the injured myocardium is restored.

81 Our laboratory has recently reported that the process of regeneration can occur even  
82 after 6 rounds of cryoinjuries interspaced by at least 30 days of recovery in the same individual  
83 zebrafish (Bise et al., 2020). In this case, the zebrafish myocardium remains at the proliferative  
84 mode during more than a half a year, which can be considered as a relatively chronic condition  
85 for this species. Despite this challenge, no neoplastic malformation has been observed,  
86 suggesting a robust control of the cell cycle dynamics. To determine whether zebrafish  
87 cardiomyocytes are generally protected from neoplastic transformation, we aimed to challenge  
88 the system by conditional and tissue-specific overexpression of an oncogene.

89 Several human cancers have been linked to a missense gain-of-function mutation in the  
90 HRAS protein that substitutes glycine at the position 12 with another amino acid, such as valine  
91 (G12V)(Keeton et al., 2017; Li et al., 2018). In zebrafish, tissue specific overexpression of  
92 HRAS<sup>G12V</sup> fused to GFP at its N-terminus, referred to as GFP-HRAS<sup>G12V</sup>, resulted in  
93 melanoma, leukemia, glioblastoma and chondroma (Lieschke and Currie, 2007; MacRae and  
94 Peterson, 2015; Mayrhofer et al., 2017; Mayrhofer and Mione, 2016; Santoriello and Zon,  
95 2012). These findings demonstrate that GFP-HRAS<sup>G12V</sup> acts as an oncogene in stem/progenitor  
96 cells of various tissues in zebrafish. Another related oncogene, KRAS<sup>G12D</sup> causes  
97 rhabdomyosarcoma during development (Chen and Langenau, 2011; Storer et al., 2013).  
98 However, the effects of the activated RAS have not yet been characterized in differentiated  
99 post-embryonic cardiomyocytes in zebrafish.

100 RAS proteins are small GTPases linked to the plasma membrane, which normally relay  
101 signals from a variety of transmembrane receptors to intracellular effectors that control  
102 processes, such as cell-cycle entry, cell survival, cytoskeleton reorganization, energy

103 homeostasis and metabolism (Simanshu et al., 2017; Zhou et al., 2016). RAS activates several  
104 cascades of protein-protein interactions and phosphorylation. In mammals, one of the effector  
105 pathways is the PI3K/AKT/mTOR cascade that regulates multiple aspects of cell physiology  
106 (Gysin et al., 2011; Keeton et al., 2017). Overactivation of this pathway leads to competitive  
107 growth and metabolic advantage, promoting an oncogenic phenotype (Shaw and Cantley,  
108 2006). In zebrafish, RAS-driven melanoma and rhabdomyosarcoma models showed that only  
109 a combined suppression of MAPK and PI3K/mTOR signaling can synergistically impair tumor  
110 growth (Fernandez del Ama et al., 2016; Le et al., 2013). Whether in other neoplasia models a  
111 single inhibitor treatment against TOR signaling is sufficient to suppress tumorigenesis remains  
112 to be shown.

113 In this study, we developed a cardiac-specific tamoxifen-dependent Gal4-ERT2/UAS  
114 model to achieve uniform but conditionally regulated expression of the oncogene HRAS<sup>G12V</sup> in  
115 zebrafish cardiomyocytes. We assessed whether the larval and the adult zebrafish heart is  
116 susceptible to tumorous transformation. Then, we investigated if the HRAS-induced phenotype  
117 is dependent on the downstream TOR pathway. We applied several methodological approaches  
118 to determine whether cardiac neoplasia shares similar molecular signatures to those involved in  
119 regeneration. The strength of our comparative approach is the use of the same type of  
120 specialized cells, namely post-developmental zebrafish cardiomyocytes, which have been  
121 challenged to either regenerative or neoplastic growth.

122

## 123 **Results**

124

### 125 **Efficient induction of the cardiac Gal4-ERT2/UAS system in the larval and adult heart**

126 To investigate, whether the zebrafish myocardium is susceptible to neoplastic transformation,  
127 we assessed the effects caused by conditional overexpression of the HRAS<sup>G12V</sup> oncogene in  
128 cardiomyocytes. To this aim, we generated a transgenic fish line containing a cardiac specific  
129 promoter, *cmlc2*, upstream of Gal4 fused to a tamoxifen-binding ERT2 domain. In the absence  
130 of 4-hydroxytamoxifen (4-OHT), Gal4-ERT2 is retained in the cytoplasm, preventing its  
131 function as a transcriptional activator (Akerberg et al., 2014; Gerety et al., 2013). To facilitate  
132 screening of transgenic fish, we linked the *cmlc2:Gal4-ERT2* cassette to a lens marker with a  
133 *crystallin alpha-a* promoter and Kusabira Orange 2 protein, *cryaa:KO2*. This transgenic fish  
134 were crossed with *UAS:GFP-HRAS<sup>G12V</sup>*, and the double transgenic fish were named  
135 *cmlc2/GFP-HRAS*. Control fish were *cmlc2:Gal4-ERT2; UAS:mRFP*, abbreviated as  
136 *cmlc2/RFP* (**Figure 1a**).

137 To assess the efficiency of the genetic system, we designed two experiments with three  
138 overnight pulses of 3  $\mu$ M 4-OHT or 0.05% DMSO treatment over 12 days starting at the  
139 embryonic stage (3 dpf) and post-embryonic stage (21 dpf), as illustrated (**Supplementary**  
140 **Figure S2a, d**). We named these developmental time-windows as early and late larval stages.  
141 4-OHT treatment did not affect the body length of the fish, suggesting normal developmental  
142 growth (**Supplementary Fig. S2**). However, we noticed that *cmlc2/GFP-HRAS* larvae exposed  
143 to 4-OHT treatment had a slightly protruding heart from their chest, which was not observed in  
144 the DMSO-treated group (**Figure 1c, Supplementary Figure S2 and Figure S3c**). Fluorescent  
145 live-imaging of larvae demonstrated that DMSO-treated *cmlc2:RFP* and *cmlc2/GFP-HRAS* fish  
146 did not display any fluorescence in the heart, whereas after 4-OHT treatment, *cmlc2:RFP* and  
147 *cmlc2/GFP-HRAS* exhibited red and green fluorescent hearts, respectively (**Figure 1a-c and**  
148 **Supplementary Figure S3a-c**). This result demonstrates that the Gal4-ERT2 activity was  
149 controlled by tamoxifen exposure, as predicted. We concluded that the *cmlc2:Gal4-ERT2/UAS*  
150 system is suitable to induce gene expression in the larval heart at different developmental  
151 timepoints.

152 To determine the efficiency of gene induction in cardiomyocytes of *cmlc2/GFP-HRAS*  
153 larval heart, we conducted immunofluorescence analysis of tissue sections (**Figure 1d and**  
154 **Supplementary Fig. S3d**). In both early and late larval stages, at least 87% of Tropomyosin-  
155 positive cells (cardiomyocytes) were also labelled with fluorescent proteins in *cmlc2/GFP-*  
156 *HRAS* hearts treated with 4-OHT (**Figure 1e and Supplementary Fig. S3e**). Consistently, RAS  
157 proteins were immunodetected in 88% of cardiomyocytes in 4-OHT-treated *cmlc2/GFP-HRAS*  
158 fish at 14 and 32 dpf. In 4-OHT-treated *cmlc2/RFP* hearts, at least 91 % of cardiomyocytes  
159 expressed red fluorescent reporter, while no RAS immunoreactivity was detected (**Figure 1e**  
160 **and Supplementary Fig. S3e**). These high proportions of GFP and RAS-positive  
161 cardiomyocytes demonstrate that the *Gal4-ERT2/UAS* system is suitable for cardiac-specific  
162 inducible gene expression.

163 Our next goal was to determine whether the HRAS oncogene expression results in the  
164 increase of cell proliferation in the myocardium. To this aim, we assessed immunoreactivity of  
165 MCM5, a marker of the G1/S phase (de Preux Charles et al., 2016b; Ryu and Driever, 2014).  
166 We found that the proportion of MCM5 and Tropomyosin double positive cells was twice  
167 higher in hydroxytamoxifen-treated *cmlc2/GFP-HRAS*, compared to *cmlc2/RFP*, suggesting  
168 excessive proliferation (**Supplementary Fig. S4**). In addition, we detected a change in the  
169 density of the trabecular myocardium. Hydroxytamoxifen-treated *cmlc2/GFP-HRAS* had a  
170 smaller area of luminal cavities and a larger area of muscle tissue within the ventricular sections,

171 compared to *cmlc2/RFP* (**Supplementary Fig. S4d, h**). This suggests increased compaction of  
172 the myocardial architecture. These results demonstrate that activated HRAS overexpression  
173 promotes cardiomyocyte proliferation and an intraluminal growth of the trabecular  
174 myocardium.

175 We assessed whether our conditional Gal4-ERT2/UAS system is also suitable to  
176 overexpress activated HRAS in the adult zebrafish heart. For this, we designed an experiment  
177 over 16 days with four overnight pulses of 2.5  $\mu$ M 4-OHT at 0, 6, 11 and 14 days (**Figure 1f**).  
178 We used control and *cmlc2/GFP-HRAS* transgenic fish between 6 and 8 months-old with  
179 similar standard length to ensure similar heart size. Immunofluorescence analysis of heart  
180 sections showed that at least 80% of cardiomyocytes were positively labeled with fluorescent  
181 proteins (**Figure 1h-i**). Immunodetection of Ras protein was observed in 86% of  
182 cardiomyocytes in *cmlc2/GFP-HRAS* adult hearts. In control hearts, Ras immunostaining was  
183 present only in the connective tissue at the valve, but not in the myocardium (**Figure 1h**). These  
184 results demonstrate that the Gal4-ERT2 system is also efficient for oncogene induction in the  
185 entire adult myocardium.

186 The histological AFOG (Acid Fuchsin Orange-G) staining of heart sections revealed the  
187 increase of ventricular size in *cmlc2/GFP-HRAS* adult hearts after induction compared to  
188 control (**Figure 1g**). This phenotype was associated with abnormal tissue morphology,  
189 particularly in a wide margin of the ventricle. In comparison to the normal trabecular  
190 myocardium, the peripheral layer of these gigantic hearts was lacking typical slender  
191 myocardial fascicles, interspaced by luminal cavities. Instead, this region of the heart contained  
192 irregular or spindle-shaped cells that were arranged in a disorganized manner, without  
193 distinctive trabecular bundles and lacunary spaces (**Figure 1g**). These histopathological  
194 features indicate a loss of normal specialized architecture in the expanded tissue, suggesting  
195 neoplasia formation. We decided to analyze the cellular causes of this phenotype in the later  
196 part of this study, in parallel to a potential rescue approach that counteracts this excessive  
197 growth.

198

### 199 **Monitoring the reversibility of oncogene expression after withdrawing 4-OHT treatment**

200 Because our preliminary tests revealed that younger transgenic zebrafish better tolerated the  
201 hydroxytamoxifen treatment than adult zebrafish, we selected a suitable stage at approx. 1  
202 month post-fertilization for a series of further experiments. Furthermore, we reduced the  
203 number of hydroxytamoxifen pulses to two.



204           The Gal4-ERT2 system relies on a drug-dependent inducibility, suggesting its  
205 reversibility after 4-OHT withdrawal. We designed an experiment to compare the effects of  
206 oncogene induction followed by a short and longer recovery during 2 and 6 days, respectively,  
207 as illustrated (**Figure 2a**). At 35 and 39 dpf, live-imaging of *cmlc2/GFP-HRAS* fish revealed  
208 weaker expression of GFP in the hearts after a 6 day-recovery as compared to a 2 day-recovery,  
209 consistent with discontinued 4-OHT treatment (**Figure 2b**). To further understand this  
210 observation, we performed triple immunofluorescence staining of heart sections using  
211 Tropomyosin, GFP and RAS antibodies. In this experiment, we focused on the reversibility of  
212 transgene expression after withdrawing 4-OHT treatment by the analysis of the GFP/RAS  
213 intensity in these hearts. Hearts after a 2 day-recovery (at 35 dpf) displayed a uniform  
214 expression of GFP in the entire ventricle. By contrast, hearts after a 6 day-recovery (39 dpf)  
215 showed a conspicuous difference of GFP/RAS immunostaining between the periphery and the  
216 center of the ventricle (**Figure 2c**). Specifically, a 30  $\mu\text{m}$  wide layer of the myocardial wall  
217 contained approx. 4-times less GFP staining, compared to the central portion (**Figure 2f**). These  
218 data suggest that the layer of GFP-negative myocardium contains cardiomyocytes that were  
219 newly generated. This result is consistent with the reversibility of Gal4-ERT2/UAS system after  
220 4-OHT withdrawal. However, pre-existing cardiomyocytes during 4-OHT exposure still  
221 displayed GFP and RAS immunoreactivity, suggesting a cellular persistence of these proteins.  
222 Taken together, our results demonstrate that the *cmlc2-Gal4-ERT2/UAS* system is suitable for  
223 conditional overexpression of genes in zebrafish cardiomyocytes, even though the limitation of  
224 the system concerns the speed of protein turnover.

225           In addition to the methodological assessment of the system, the monitoring of GFP-  
226 positive versus GFP-negative cardiomyocytes suggested that heart growth occurred  
227 predominantly at its marginal zone. Quantification of ventricular surface revealed that hearts  
228 after 6 day-recovery (39 dpf) were 30% larger than after 2 day-recovery (35 dpf) (**Figure 2c-**  
229 **d**). This increase could at least partially be caused by persisting HRAS in cardiomyocytes.  
230 Consistently, the density of the GFP-positive myocardium was similar between both groups,  
231 suggesting that increase of the heart dimension was not associated with further compaction of  
232 the trabecular architecture (**Figure 2e**). Thus, during the recovery period, the ventricle grew  
233 mostly by outwards expansion, rather than by growing into the intraluminal space.

234  
235  
236

237 **Neoplastic characteristics of the HRAS-expressing heart resemble cellular and molecular**  
238 **features of the regenerating myocardium**

239 As explained in the previous chapter, we continued our study with pre-juvenile  
240 zebrafish, according to the selected protocol with two pulses of hydroxytamoxifen treatment at  
241 26 and 32 dpf, followed by 2 days of recovery (**Figure 3a**). To investigate the morphological  
242 changes of the heart upon HRAS expression, we dissected and imaged hearts (**Figure 3b**).  
243 Quantification of the whole hearts revealed an approx. 3- and 4-times larger ventricle and  
244 atrium, respectively, in HRAS-expressing hearts compared to control (**Figure 3b-c**). This result  
245 demonstrates that the heart size was dramatically increased within a few days upon oncogene  
246 expression.

247 To determine the cellular changes associated with this phenotype, we conducted several  
248 immunofluorescence analysis of heart sections. The proliferation assay using MCM5, a marker  
249 of the G1/S phase, revealed 7-times more MCM5-expressing cardiomyocytes in the  
250 myocardium of *cmhc2/GFP-HRAS*, compared to *cmhc2/RFP* control (**Fig. 3d-e**). This result  
251 reveals that the gigantic expansion of the organ was associated with hyperproliferation of  
252 cardiomyocytes.

253 Mature zebrafish cardiomyocytes are diploid and can proliferate without any  
254 remarkable dedifferentiation during normal ontogenetic growth or disease-associated  
255 cardiomegaly (González-Rosa et al., 2018; Sun et al., 2009; Wills et al., 2008). To examine the  
256 differentiation state of cardiomyocytes in the enlarged HRAS-expressing hearts at 35 dpf, we  
257 performed staining with N2.261 antibody. This antibody, referred to as embCMHC, detects  
258 immature cardiomyocytes during development up to 14 dpf, and it also detects dedifferentiated  
259 cardiomyocytes during regeneration of the adult heart (**Supplementary Fig. S1**) (Pfefferli and  
260 Jaźwińska, 2017; Sallin et al., 2015). Control *cmhc2/RFP* ventricles did not show any reactivity  
261 to this antibody at the juvenile stage, although some adjacent skeletal muscles were  
262 immunolabeled (**Figure 3f**). By contrast, in *cmhc2/GFP-HRAS* fish, 62 % of ventricular  
263 cardiomyocytes were labeled with N2.261 antibody, suggesting a globally altered state of the  
264 myocardium (**Figure 3f-g**).

265 To further examine the level of differentiation, we used antibodies against alpha-Actinin  
266 and Myomesin, which localize at the Z-band and the M-band of sarcomeres, respectively. We  
267 found that *cmhc2/GFP-HRAS* cardiomyocytes displayed lower expression of both proteins  
268 when compared to control hearts (**Figure 3h-i, Supplementary Fig. S5**). Taken together, the  
269 expression of the embryonic cardiac myosin heavy chain isoform and downregulation of  
270 sarcomere-organizing proteins suggest that HRAS-expressing cardiomyocytes reverted to a less



271 differentiated state. This cellular transformation demonstrates that the overgrowth of the  
272 myocardium is based on multiplication of structurally aberrant cardiomyocytes, representing a  
273 neoplasia-like model.

274 Upregulation of embryonic cardiac programs and disruption of sarcomeres also occur  
275 in the peri-injury myocardium of regenerating hearts. This phenotypic similarity between  
276 regeneration- and oncogene-induced dedifferentiation should be investigated at the gene  
277 expression level. New regeneration-responsive genes have been identified in the heart by  
278 Histone H3.3 profiling (Goldman et al., 2017). Among these markers are *transgelin* (*tagln*), the  
279 zebrafish ortholog of smooth muscle actin, *anillin* (*anln*), required for cleavage furrow  
280 formation during cytokinesis, and ankyrin repeat protein (*ankrd1a*), upregulated during cell  
281 stress. To determine whether these validated regeneration-responsive markers are also  
282 upregulated during HRAS-mediated cardiac neoplasia, we performed quantitative RT-PCR  
283 analysis. We found that in comparison to *cmlc2/RFP* control hearts, *cmlc2/GFP-HRAS* hearts  
284 showed a 30-fold increase of *anln* and *ankrd1a* expression and a 5-fold increase of *tagln*  
285 transcription (**Figure 3j**). These results show that cardiac regeneration-responsive genes are  
286 highly upregulated in neoplastic hearts. This finding suggests that a similar transcriptional  
287 modulation underlies the proliferative activation of cardiomyocytes in regenerating and  
288 oncogene-transformed hearts.

289

### 290 **HRas-induced cardiac neoplasia is associated with ECM remodeling and inflammation**

291 A microenvironmental niche is critical for the propagation of new tissue within the pre-  
292 existing organ (Justus et al., 2015). In particular, the extracellular matrix (ECM) plays a key  
293 role to facilitate the spatial expansion of newly generated cells during either regeneration or  
294 neoplasia (Hussey et al., 2018; Lu et al., 2012). We hypothesized that some ECM proteins might  
295 be involved in both contexts. Collagen XII (ColXII) is a non-fibrillar collagen known to  
296 increase tissue plasticity in mammals (Chiquet et al., 2014), and is upregulated in the  
297 regenerating heart in zebrafish (**Supplementary Fig. S1**) (Marro et al., 2016). To determine if  
298 this protein is also associated with the extensive growth in HRAS-expressing hearts, we  
299 performed immunofluorescence staining with a specific antibody (Bader et al., 2009).  
300 Interestingly, we found that ColXII, which is a marker of the epicardium and connective tissue  
301 in the ventricle, was abnormally deposited in the myocardium of *cmlc2/GFP-HRAS* hearts  
302 (**Supplementary Fig. S6a-b**). We concluded that ColXII contributes to the micromilieu of the  
303 neoplastic myocardium, similarly to the one of the peri-injury myocardium.

304 Wounded organs and tumors are typically infiltrated with immune cells, which act not  
305 only to resolve damaged tissues, but also to secrete factors modulating various cellular  
306 responses (Mantovani et al., 2008). In several studies, leucocytes have been shown to be crucial  
307 for heart regeneration in zebrafish (Bevan et al., 2020; de Preux Charles et al., 2016a; Huang et  
308 al., 2013; Lai et al., 2017; Simões et al., 2020). In particular, L-plastin-expressing phagocytes  
309 are abundant in cryoinjured ventricles (**Supplementary Fig. S1**). To assess the contribution of  
310 phagocytes and other neutrophils in the neoplastic hearts, we performed immunostaining  
311 against L-plastin and Myeloperoxidase (Mpx), respectively (Keightley et al., 2014; Morley,  
312 2012; Redd et al., 2006). We found that *cmlc2/HRAS*-expressing hearts contained enhanced  
313 numbers of L-plastin-positive cells, but not Mpx-positive neutrophils compared to *cmlc2/RFP*  
314 control (**Supplementary Fig. S6c**). L-plastin-labeled cells morphologically resembled large  
315 macrophage-like cells (**Supplementary Figure S6c**). They were located predominantly at the  
316 peripheral wall of the heart, suggesting that this region particularly attracted the immune cells  
317 (**Figure 2c**). These data indicate that the neoplastic phenotype is associated with an  
318 inflammatory reaction. Taken together, the expansion of ColXII-positive ECM and the  
319 infiltration of L-Plastin-positive phagocytes suggest a similar microenvironmental modulation  
320 associated with regenerative and neoplastic growth of the myocardium.

321  
322 **Hypoxia and modifications of the mitochondrial metabolism are induced both in**  
323 **regenerative and neoplastic growth**

324 A common hallmark of mammalian tumors is hypoxia, which is known to promote aggressive  
325 growth and to upregulate alternative metabolic pathways (Hapke and Haake, 2020; Xiong et  
326 al., 2020). Hypoxia and metabolic reprogramming have also been observed in the regenerating  
327 zebrafish heart (Honkoop et al., 2019; Jopling et al., 2012). To assess hypoxia, we used  
328 pimonidazole hydrochloride (hypoxyprobe), which is a water soluble, non-toxic and clinically  
329 relevant chemical reagent that forms stable covalent adducts with thiol groups in proteins and  
330 amino acids at low oxygen conditions (Arteel et al., 1995). To detect such modifications in  
331 cells, we performed immunofluorescence staining with a specific antibody against adducts of  
332 pimonidazole.

333 To analyze the cellular oxygen condition of regenerating hearts, we incubated adult  
334 zebrafish for 1 day with hypoxyprobe at 6 to 7 days after cryoinjury (**Figure 4a**). Control hearts  
335 did not display any labelling, while regenerating hearts contained hypoxic cardiomyocytes in  
336 the peri-injured myocardium (**Figure 4b**). This result is consistent with a previous study based  
337 on the ventricular resection model (Jopling et al., 2012). After this validation, we treated

338 control and *cmlc2/GFP-HRAS* juvenile fish for 24 hours at 34 dpf, as illustrated (**Figure 4c**).  
339 We observed abundant hypoxic cardiomyocytes in *cmlc2/GFP-HRAS*, while control hearts  
340 remained almost unlabeled with the hypoxyprobe (**Figure 4d**). This result indicates that  
341 overexpression of activated HRAS triggers hypoxic conditions in the myocardium. We  
342 concluded that regenerating and neoplastic cardiomyocytes experience lower oxygen levels,  
343 which can be associated with metabolic changes.

344 Cells subjected to hypoxia adapt their metabolism to the decreased oxygen availability.  
345 Mitochondria are the major oxygen-consuming organelles of the cell for a purpose of the energy  
346 production. To assess whether hypoxia in regenerating and neoplastic hearts is linked to  
347 changes of these organelles, we analyzed the expression of two markers, namely the  
348 mitochondrial cytochrome c oxidase IV (Cox-IV), which is an enzymatic subunit of the  
349 respiratory electron transport chain, and the transporter protein Porin/VDAC1 of the outer  
350 mitochondrial membrane. In regenerating hearts at 7 dpci, we observed that Cox-IV  
351 immunostaining was lower in the peri-injured myocardium, compared to the central part of the  
352 ventricle (**Figure 4e**). Such a difference in expression level was not observed for Porin, which  
353 was uniformly immunodetected throughout the entire myocardium. Then, we analyzed both  
354 mitochondrial markers in 4-OHT-treated *cmlc2/HRAS* and *cmlc2/RFP* juvenile fish. We found  
355 that Cox-IV expression was nearly undetectable in neoplastic hearts, compared to control,  
356 whereas Porin immunodetection was not altered between both experimental groups (**Figure 4f**).  
357 Based on Porin expression, we concluded that the composition of the outer mitochondrial  
358 membrane is stable in control and manipulated cardiomyocytes. Our results with Cox-IV  
359 demonstrate that regeneration and cardiac neoplasia were associated with the downregulation  
360 of the oxidative respiration complex, suggesting a reduction of the mitochondrial function for  
361 energy production.

362

### 363 **pSmad3-dependent TGF $\beta$ pathway and mTOR signaling are activated in HRAS-induced** 364 **cardiac neoplasia and regeneration**

365 To investigate the molecular factors involved in HRAS-induced cardiac neoplasia, we assessed  
366 several candidate signaling pathways that are known to regulate cell proliferation in the  
367 zebrafish heart. Our laboratory has previously demonstrated that TGF $\beta$  signaling stimulates  
368 cardiomyocyte proliferation during heart regeneration (**Supplementary Figure S1**) (Chablais  
369 and Jazwinska, 2012). To visualize the activation of this pathway, we performed  
370 immunofluorescence analysis of the phosphorylated signal transducer Smad3 with anti-pSmad3  
371 antibody. Consistent with previous studies, pSmad3 immunoreactivity was detected in the peri-

372 injury myocardium, which was highlighted by the transgenic *careg:eGFP* expression in  
373 regenerating hearts (**Supplementary Figure S7a-b**) (Pfefferli and Jaźwińska, 2017).  
374 Interestingly, in neoplastic *HRAS*-expressing hearts of juvenile fish, the number of pSmad3-  
375 positive cardiomyocytes was also highly increased, compared to control hearts  
376 (**Supplementary Figure S7c-e**). This result suggests that cardiomyocytes subjected to either  
377 regenerative growth or *HRAS*-induced neoplastic growth activate the pSmad3-dependent TGFβ  
378 signaling pathway.

379 One of the main signaling pathways activated by RAS is rapamycin-sensitive kinase  
380 TOR and its downstream target the ribosomal protein S6 (S6) (Simanshu et al., 2017).  
381 Phosphorylation of S6 promotes protein synthesis and modulate cell energetics (Saxton et al.,  
382 2017). To assess the TOR signaling pathway, we analyzed phosphorylation of S6 (pS6) by  
383 immunofluorescence staining. In adult hearts at 7 dpci, pS6 was strongly induced in the peri-  
384 injury myocardium, which was visualized by transgenic expression of *careg:dmKO2* in the  
385 heart (**Figure 5a, c**) (Pfefferli and Jaźwińska, 2017). In the neoplasia model, *cmlc2/GFP-HRAS*  
386 hearts displayed very strong labeling with the pS6 antibody throughout the entire myocardium,  
387 while analysis of control hearts revealed no pS6-immunoreactivity (**Figure 5b, d**). These  
388 findings demonstrate that both cardiac regeneration and oncogene-induced neoplasia activate  
389 TOR signaling in the myocardium.

390 To determine whether the TOR pathway is required for regenerative or neoplastic  
391 cardiac growth, we used rapamycin, the prototypical inhibitor of the TOR kinase (Porta et al.,  
392 2014). We first examined whether rapamycin can suppress its downstream target pS6. In adult  
393 hearts at 7 dpci, treatment with 1 μM rapamycin suppressed the pS6-immunolabelling in  
394 cardiomyocytes of the peri-injured zone (**Figure 5e-g**). In the cardiac neoplasia model, 3 days  
395 treatment with 0.5 μM rapamycin abrogated pS6 immunoreactivity in *cmlc2/GFP-HRas*  
396 (**Figure 5f, h**). We concluded that rapamycin blocks the activation of the TOR pathway both in  
397 regenerating and neoplastic cardiomyocytes.

398

### 399 **Inhibition of mTOR signaling impairs heart regeneration**

400

401 The effects of rapamycin on heart regeneration have been previously investigated in the  
402 ventricular resection model (Chávez et al., 2020). Here, to determine the effects of rapamycin  
403 treatment on heart regeneration after cryoinjury, we designed experiments with two analyzed  
404 time points at 7 and 30 dpci (**Figure 6a,c**). At 30 dpci, histological analysis with AFOG staining  
405 revealed a large collagen-rich fibrotic tissue after rapamycin treatment as compare to DMSO-

406 treated control (**Figure 6a-b**). While in control DMSO-treated fish, the regeneration process  
407 was ongoing, rapamycin-treated hearts display a persisting fibrin clot around the damaged  
408 myocardium, which in our cryoinjury-model is observed only in the first two weeks after  
409 wounding (**Figure 6b**) (Chablais et al., 2011). We concluded that the inhibition of TOR  
410 signaling impaired heart regeneration.

411 To determine the cellular causes associated with this phenotype, we performed  
412 immunofluorescence analysis of hearts at 7 dpci. In order to quantify proliferating  
413 cardiomyocytes, we performed PCNA antibody staining using the *cmhc2:DsRed2-nuc*  
414 transgenic fish line, in which cardiac nuclei are labeled by red fluorescence. We found that the  
415 rapamycin treatment resulted in a 5-fold reduction of PCNA/DsRed-positive nuclei in the peri-  
416 injury zone of the myocardium, suggesting impaired cardiomyocyte proliferation (**Figure 6c-**  
417 **e**). Then, we assessed the effect of TOR inhibition on cardiomyocyte dedifferentiation using  
418 embryonic cardiac myosin heavy chain (embCMHC) marker. We found that rapamycin  
419 treatment caused a 2.5-fold decrease of embCMHC-expression in the peri-injured zone (**Figure**  
420 **6f-g**), suggesting a reduced reactivation of embryonic programs. However, immunostaining  
421 against L-plastin, a phagocyte-specific actin-bundling protein, showed that immune cell  
422 recruitment was not impaired after rapamycin treatment at 7 dpci (**Supplementary Figure**  
423 **S10**). These results indicate that the inhibition of Tor signaling impairs myocardial regeneration  
424 by suppressing the activation of cardiomyocytes in the peri-injury zone, without modulation of  
425 phagocyte recruitment in the wound.

426

### 427 **Inhibition of mTOR signaling reduces aggressiveness of cardiac neoplasia**

428 In our cardiac neoplasia model, rapamycin treatment in juvenile fish reduced the size of  
429 *cmhc2/GFP-HRAS* ventricles (**Figure 5h**). To further examine whether inhibition of TOR  
430 prevents aggressive growth of the myocardium, we applied rapamycin treatment between the  
431 hydroxytamoxifen pulses according to the schedule in the cardiac neoplasia model (**Figure 7a**).  
432 The treatment did not affect the size of larvae which was similar between experimental groups  
433 (**Supplementary Fig. S8**). Live-imaging of these zebrafish showed that GFP-positive hearts in  
434 rapamycin-treated *cmhc2/GFP-HRAS* appeared smaller than in DMSO-treated *cmhc2/GFP-*  
435 *HRAS* (**Supplementary Fig. S8**). Such a difference was not detected in *cmhc2/RFP* control.

436 To closely examine this observation, we dissected the hearts and quantified the surfaces  
437 of the ventricle and atrium. In *cmhc2/RFP* control, we did not observe a difference between  
438 DMSO- and rapamycin- treated groups (**Figure 7b, c**). In contrast, the hearts of *cmhc2/GFP-*  
439 *HRAS* fish were twice smaller after rapamycin-exposure than after DMSO (**Figure 7b, c**). Thus,



440 rapamycin-treatment counteracted the aggressive neoplastic growth to such an extent, that  
441 ventricle and atrium size were only slightly larger than in *cmlc2/RFP* control. This result  
442 suggests that the neoplastic growth can be suppressed by the inhibition of TOR signaling.

443 To determine the cellular changes associated with the rapamycin-mediated suppression  
444 of neoplasia, we performed immunofluorescence analysis of heart sections. First, we aimed to  
445 investigate whether rapamycin somehow interfered with the activation of the Gal4-ERT2/UAS  
446 system. Analysis of fluorescent proteins in heart sections of *cmlc2/GFP-HRAS* and *cmlc2/RFP*  
447 fish excluded this possibility, as there was no difference in the proportion of GFP and RFP  
448 expression between rapamycin- and DMSO-treated fish (**Supplementary Fig. S9a-d**). Thus,  
449 the effects of rapamycin treatment in neoplastic hearts are not due to impaired transgene  
450 expression.

451 To examine the density of the myocardium, we quantified the percentage of  
452 Tropomyosin-positive area in ventricular sections. This analysis revealed that myocardial  
453 compaction was less severe in neoplastic hearts after rapamycin-treatment, compared to after  
454 DMSO treatment (**Supplementary Fig. S9e**). Examination of the proliferation marker MCM5  
455 demonstrated that the number of proliferating cardiomyocytes was decreased by 50% in  
456 rapamycin-treated *cmlc2/GFP-HRAS* fish as compared to the DMSO-treated group (**Figure 7d-**  
457 **e**). Such reduction of MCM5/Tropomyosin-positive cells was not observed in *cmlc2/RFP*  
458 control suggesting that the rapamycin attenuates cell proliferation in the neoplastic context, but  
459 not normal growth (**Figure 7d-e**). Next, we aimed to determine the differentiation level of  
460 HRAS-positive cardiomyocytes after TOR inhibition using embCMHC, a marker of embryonic  
461 cardiac myosin isoform. We found that the myocardium of rapamycin-treated *cmlc2/GFP-*  
462 *HRAS* hearts comprised 4-times fewer embCMHC-positive cells, compared to those treated  
463 with DMSO (**Figure 7f-g**). This result suggests an improvement in the differentiation status of  
464 cardiomyocytes through TOR inhibition in neoplastic hearts.

465 Finally, the proportion of L-plastin positive cells was significantly reduced in  
466 rapamycin-treated *cmlc2/GFP-HRAS* compared to DMSO-treated neoplastic hearts  
467 (**Supplementary Figure S10**), suggesting that the repression of the TOR pathway also reduces  
468 the inflammatory reaction associated with the cardiac neoplasia. Taken together, the inhibition  
469 of TOR signaling was sufficient to reduce various effects of neoplasia, such an overgrowth of  
470 the cardiac chambers, excessive cell proliferation, abnormal dedifferentiation of  
471 cardiomyocytes and enhanced inflammation. We concluded that the oncogene-mediated  
472 cardiac neoplasia can be suppressed by the inhibition of TOR signaling.

473



474  
475  
476  
477  
478  
479  
480  
481  
482  
483  
484  
485  
486  
487  
488  
489  
490  
491  
492  
493  
494  
495  
496  
497  
498  
499  
500  
501  
502  
503  
504  
505  
506

## **HRAS-induced cardiac neoplasia in the adult heart is counteracted by the inhibition of TOR**

To further investigate the antagonistic effects of the TOR inhibition on neoplasia, we performed experiments with adult *cmlc2/GFP-HRAS* and *cmlc2/RFP* zebrafish. To this aim, we treated adult fish with DMSO or rapamycin between the hydroxytamoxifen pulses, as illustrated (**Figure 8a**). At the end of the scheduled procedure, we dissected hearts for live-imaging. As expected (**Figure 1h-i**), we found that *cmlc2/GFP-HRAS* and *cmlc2/RFP* hearts expressed respective fluorescent marker proteins, validating the induction of the Gal4-ERT2/UAS system (**Figure 8b**). Quantification of the ventricular surface showed a twice larger size of *cmlc2/GFP-HRAS* hearts as compared to *cmlc2/RFP* in DMSO-treated control fish (**Figure 8b, c**). No change in the ventricular size was observed in rapamycin-treated *cmlc2/RFP* fish, demonstrating little effects of this drug at normal conditions. However, rapamycin treatment rescued the excessive growth phenotype in *cmlc2/GFP-HRAS* hearts (**Figure 8b-c**). This result demonstrates that similarly to the results in pre-juvenile fish, the TOR inhibition also reduced the neoplastic growth in adult hearts.

Consistent with this finding, immunofluorescence analysis of PCNA revealed a reduced number of proliferating cardiomyocytes in *cmlc2/GFP-HRAS* hearts treated with rapamycin, compared to DMSO (**Figure 8d, e**). Next, we aimed to determine if this proliferative reduction was associated with modulation of cell differentiation. Normally, adult hearts do not express embCMHC in the intact heart, with the exception of few myocardial fibers in the vicinity to the valves (Sallin et al., 2015). In contrast, adult *cmlc2/GFP-HRAS* hearts comprised embCMHC-positive cardiomyocytes, suggesting their incomplete differentiation status (**Figure 8f**). Quantification analysis demonstrated that 18 % of the myocardial area in *cmlc2/GFP-HRAS* hearts was labeled with embCMHC antibody. Remarkably, rapamycin treatment decreased this proportion to 3 %, suggesting an improved differentiated status of the myocardium (**Figure 8g**). This suggests that the inhibition of TOR not only suppressed excessive proliferation, but also prevented abnormal dedifferentiation of cardiomyocytes, despite the expression of the HRAS oncogene.

## 507 **Discussion**

508 Regenerative and tumorigenic cells have been recognized to have similar features, based on  
509 their proliferative character in functional organs. These assumptions are frequently based on  
510 comparison between one tissue type that can regenerate with another different cell type that  
511 forms a tumor (Milanovic et al., 2018; Oviedo and Beane, 2009; Sarig and Tzahor, 2017; Wong  
512 and Whited, 2020). The power of our approach relies on the examination of the same cell type,  
513 namely post-embryonic cardiomyocytes, which have been stimulated to enter the cell-cycle  
514 either by the regenerative or the oncogenic program. To induce regeneration, we cryoinjured  
515 the ventricle. In order to achieve the oncogenic stimulation, we established an inducible  
516 transgenic system that relies on a spatial restriction to the myocardium and a temporal  
517 regulation through chemical treatment. We verified the robustness of this system in the early  
518 larval, pre-juvenile, and adult life stages. Based on several sets of experiments, we identified  
519 the existence of similar cellular and molecular mechanisms involved in the regenerating and  
520 oncogenic myocardium. Firstly, immunofluorescence analysis of sarcomeric proteins revealed  
521 similar hallmarks of cardiomyocyte dedifferentiation. Secondly, using the hypoxypromoter and  
522 mitochondrial markers, we identified a common energetic switch that is related to lower oxygen  
523 concentrations. Thirdly, the ECM component ColXII and L-Plastin-expressing phagocytes  
524 were similarly involved in both processes. Fourthly, using phosphorylated Smad3 antibody, a  
525 downstream component of the TGF $\beta$ /Activin pathway, and the phosphorylated ribosomal  
526 protein S6 antibody, linked to the TOR pathway, we demonstrated that common signaling  
527 cascades are activated in regenerating and oncogenic myocardium. Finally, the inhibition of the  
528 TOR signaling pathway acts adversely both on cryoinjury-induced regeneration and oncogene-  
529 induced neoplasia in the zebrafish heart. Taken together, we concluded that the activation of  
530 cardiomyocytes during the restorative process and destructive oncogenesis shares common  
531 mechanistic bases.

532 As defined in a seminal study by Morgan in 1900, epimorphic regeneration depends on  
533 enhanced cell proliferation within the remaining body part, typically in the vicinity of injury  
534 (Sunderland, 2010). The relation between restorative and oncogenic processes was popularized  
535 by the pathologist Harold Dvorak in 1986 in his publication “Tumors: Wounds that do not  
536 heal”(Dvorak, 2015; Ribatti and Tamma, 2018; Sundaram et al., 2018). Consistently, in the  
537 liver, a mammalian regenerative organ, chronic cytotoxic injuries of the tissue can give rise to  
538 cancer. On the other hand, regenerative organs in anamniotic vertebrates, such as the amphibian  
539 limb and lens, have been shown to be relatively resistant to oncogenic transformation even upon  
540 treatment with carcinogens (Boilly et al., 2017; Oviedo and Beane, 2009). The most long term

541 experiment with adult Japanese newts showed faithful regeneration of their lens as many as 18  
542 times spanning 16 years (Eguchi et al., 2011). Impressively, the adult caudal fin of zebrafish  
543 can efficiently regrow after 29 amputations spanning approx. 10 months (Azevedo et al., 2011).  
544 None of these studies report incidents of tumors. One possible explanation is that regenerative-  
545 competent cells might possess mechanisms that halt abnormal cell proliferation, preventing a  
546 neoplastic danger (Rojas-Muñoz et al., 2009; Stewart et al., 2013; Tanaka, 2016; Wong and  
547 Whited, 2020). How regenerating tissues are resistant to tumor formation in organisms with a  
548 high level of regeneration is not well understood. A recent elegant study showed that  
549 salamanders possess an innate DNA damage response mechanism active in the blastema to  
550 facilitate proper cell cycle progression upon injury (Sousounis et al., 2020). Tumor suppressors  
551 may also play an important role by contributing to the elimination of abnormal cells during  
552 regeneration and regulation of senescence (Hesse et al., 2015; Sarig et al., 2019; Shoffner et al.,  
553 2020; Yun et al., 2015; Yun et al., 2013). Whether zebrafish cardiomyocytes are equipped with  
554 any general anti-oncogenic mechanisms is not yet known. Even if such a mechanism exists, our  
555 study demonstrates that it cannot prevent the effects of oncogene overexpression.

556         The human heart cannot regenerate after myocardial infarction, and the lack of enhanced  
557 proliferation restricts oncogenic transformations. Therapeutic approaches to augment  
558 mammalian cardiac regeneration may include exogenous stem-cell transplantation, whereby  
559 many challenges need to be overcome (Broughton et al., 2018; Doppler et al., 2017). An  
560 alternative approach is to re-stimulate mature cardiomyocytes using factors that trigger a re-  
561 entry into the cell cycle (Ali et al., 2020; Bywater et al., 2020). Although this strategy might be  
562 more successful in terms of regenerative outcomes, forcing cardiomyocyte proliferation  
563 through application of exogenous factors risks triggering neoplasia (Sarig and Tzahor, 2017).  
564 Our study contributes to this scientific discussion in two ways. First, we show that oncogene  
565 overexpression transforms a normal zebrafish myocardium into an aberrant one. Thus, new  
566 proliferative cardiomyocytes rapidly increase the mass of the organ, but their undifferentiated  
567 character destroys the original organ architecture, which subsequently may impede its function.  
568 The second contribution of our study is the identification of molecular and cellular similarities  
569 between regeneration and tumorigenesis in zebrafish cardiomyocytes. Several cellular and  
570 molecular mechanisms are indeed shared in both processes, as listed above. The difference is  
571 that injury-induced dedifferentiation is tightly regulated and terminated once restoration is  
572 complete, whereas oncogene-induced dedifferentiation is uncontrolled and persisting. The cell  
573 cycle of aberrant cardiomyocytes cannot be stopped by any natural protective mechanisms.  
574 However, we found that in both contexts, multiplication of activated cardiomyocytes can be

575 attenuated by the drug-mediated inhibition of TOR signaling. Thus, pharmacological treatments  
576 might be necessary to balance the level of proliferation (Magaway et al., 2019). Further studies  
577 are needed to address a link between the TOR-dependent cardiomyocyte plasticity with  
578 mTORC1-mediated paligenosis, a process in which “differentiated cells become regenerative  
579 using a sequential program with intervening checkpoints: (i) differentiated cell structure  
580 degradation; (ii) metaplasia- or progenitor-associated gene induction; (iii) cell cycle re-entry”  
581 (Willet et al., 2018). On the other hand, an undesired plasticity might contribute to pathology,  
582 where the normal regenerative response is circumvented, giving rise to neoplasia. Future studies  
583 in different model organisms are required to understand the biological basis of dedifferentiation  
584 in specialized cells, towards translating regenerative biology into clinically relevant therapies  
585 (Simkin and Seifert, 2018). Such knowledge is essential to promote regenerative medicine  
586 aiming in induction of cell multiplication in damaged mature hearts.

587

588

## 589 **Methods**

### 590 **Zebrafish lines and animal procedures**

591 Wild type fish were the AB strain (Oregon). *Tg(cryaa:KO2;cmlc2:Gal4-ERT2)* transgenic line  
592 was generated in this study, as described below. Other previously published lines are:  
593 *Tg(UAS:mRFPI)* (Asakawa et al., 2008), *Tg(UAS:eGFP-H-RASG12V)* (Santoriello et al.,  
594 2009), *Tg(cmlc2:nucDsRed)* (Rottbauer et al., 2002), *Tg(careg:dmKO2)* and *Tg(careg:eGFP)*  
595 (Pfefferli and Jazwińska, 2017). Identification of both UAS strains was performed by PCR:  
596 *Tg(UAS:mRFPI)*, primers forward 5'-cgctcatcaaggagttcatgc-3' and reverse 5'-  
597 tgggtgtagctcctggtgtgg-3' ; *Tg(UAS:eGFP-H-RASG12V)*, primers forward 5'-  
598 AGCTGACCCTGAAGTTCATCT-3' and reverse 5'-GTACTGGTGGATGTCCTCAAAAG-  
599 3'. Other transgenic fish were identified by expression of fluorescent proteins.

600 Larval zebrafish at 3 to 39 dpf and adult zebrafish between 6-8 months were used in this  
601 study. Larvae and adults were maintained at 26.5°C and fed with a standard diet twice per day.

602 All assays were performed using different animals that were randomly assigned to  
603 experimental groups. The exact sample size (n) was described for each experiment in the figure  
604 legends, and was chosen to ensure the reproducibility of the results.

605 For imaging of whole zebrafish, animals were anaesthetized with buffered solution of  
606 0.6 mM tricaine (MS-222 ethyl-m-aminobenzoate, Sigma-Aldrich) in system water. Images  
607 were taken with a Leica AF M205 FA stereomicroscope. After imaging, zebrafish were  
608 euthanised and fixed for further analysis.

609 For heart cryoinjury, the fish were immersed in analgesic solution of 5 mg/L lidocaine  
610 for 1 h before procedure. Ventricular cryoinjuries were performed according to our video  
611 protocol (Chablais and Jazwinska, 2012). Briefly, anesthetized fish were placed ventral side up  
612 in a damp sponge under a stereomicroscope. After chest skin incision, a stainless steel  
613 cryoprobe precooled in liquid nitrogen was applied on the ventricle for 23-25 seconds. To stop  
614 the procedure, water was dropped on the tip of the cryoprobe, and fish were immediately  
615 returned into water. The recovery of fish after the procedure was monitored and assisted. To  
616 collect the heart, fish were euthanized in 0.6 mM tricaine solution and on wet ice. The heart  
617 was removed from the body, as shown in our video protocol (Bise and Jazwińska, 2019). For  
618 the assessment of the organ size, the dissected hearts were imaged prior the fixation using a  
619 Leica AF M205 FA stereomicroscope.

620

621 The animal housing and procedures were approved by the cantonal veterinary office of  
622 Fribourg, Switzerland.

623

#### 624 **Generation of DNA constructs and transgenic lines**

625 To generate the *Tg(cryaa:KO2;cmlc2:Gal4-ERT)* line, the pDestTol2crya:KO2 construct was  
626 first produced by replacing the Venus cassette of pDestTol2crya:Venus plasmid (kindly  
627 provided by Roehl lab) with a PCR fragment of the KO2 reporter (primers (F) 5'-  
628 TTGGCGCGCCATGGTGAGCGTGATCAAGCC-3' and (R) 5'-  
629 GGAATTCCATATGTTAGGAGTGGGCCACGGCG-3') using the restrictions sites AscI and  
630 NdeI. The p5E-cmlc2 plasmid was generated by subcloning a PCR fragment of the *cmlc2*  
631 promoter (primers (F) 5'-GGGGTACCGTGACCAAAGCTTAAATCAGTTGT-3' and (R) 5'-  
632 CGGGATCCGGAGAAGACATTGGAAGAGCC-3') in the p5E-MS2 plasmid (kindly  
633 provided by Roehl lab) using the KpnI and BamHI restriction sites. The final pDest-cryaa:KO2-  
634 cmlc2:Gal4-ERT construct was generated using multisite Gateway assembly of p5E-cmlc2,  
635 pME-Gal4-ERT2-VP16 (kindly provided by Scott Stewart)(Akerberg et al., 2014), p3E-  
636 SV40polyA (kindly provided by Roehl lab) and pDestTol2cryaa:KO2. Each plasmid was co-  
637 injected with the pCS2FA-transposase mRNA into one-cell-stage wild-type embryos (Felker  
638 and Mosimann, 2016). Founder fish (F0) were identified based red fluorescent eyes  
639 (*Tg(cryaa:KO2;cmlc2:Gal4-ERT2)*).

640

#### 641 **Drug treatments**

642 The mTOR inhibitor Rapamycin (Selleckchem) was dissolved in DMSO at a stock

643 concentration of 10 mM and used at a final concentration of 0.5  $\mu$ M for neoplastic experiments  
644 and 1  $\mu$ M for regeneration experiments. For the induction of Gal4-ERT2/UAS system, larvae  
645 and adults were incubated in 3  $\mu$ M and 2.5  $\mu$ M 4-hydroxytamoxifen (4-OHT, Sigma),  
646 respectively. This solution was made from a 10 mM stock solution dissolved in DMSO. The  
647 duration of treatments was 18 hours in the dark at the time points indicated. Control animals  
648 were kept in water with 0.05% DMSO. Zebrafish were treated with drugs at a density of 10  
649 larvae per 100 ml of water or 3 adults per 100 ml of water, and then returned to system water.

650 Detection of tissue hypoxia was performed with Hypoxyprobe Kit (HP-1; Hypoxyprobe,  
651 Inc., Burlington, MA, USA). 100 mg solid pimonidazole HCl (Hypoxyprobe<sup>TM</sup>-1) was  
652 dissolved in 1 ml Hank's buffer as a stock solution stored at 4 °C in the dark. The treatments  
653 were done by immersing zebrafish in 1:1000 diluted Hypoxyprobe stock solution in fish water  
654 for 1 day. Covalent adducts of this chemical marker in proteins and amino acids of hypoxic  
655 cells was detected by immunofluorescence, using mouse monoclonal antibody clone 4.3.11.3  
656 (included in the kit) at the dilution of 1:50, followed by secondary antibody Donkey anti Mouse  
657 AF649 (Jackson ImmunoResearch Laboratories).

658

### 659 **Immunofluorescence analysis**

660 Larvae or adult hearts were fixed in 4% paraformaldehyde (PFA) overnight at 4°C, followed  
661 by washes in PBS (3  $\times$  10 min each). Specimens were equilibrated in 30% sucrose at 4°C,  
662 embedded in tissue freezing media (Tissue-Tek O.C.T.; Sakura) and cryosectioned at a  
663 thickness of 12  $\mu$ m for larvae et 16  $\mu$ m for adult hearts. Sections were collected on Superfrost  
664 Plus slides (Fisher) and allowed to air dry for approx. 1 h at RT. The material was stored in  
665 tight boxes at -20 °C.

666 Before use, slides were brought to room temperature for 10 min, the area with sections was  
667 encircled with PAP Pen (Vector) to keep liquid on the slides and left for another 10 min at RT  
668 to dry. Then, the slides were transferred to coplin jars containing 0.3% Triton-X in PBS (PBST)  
669 for 10 min at RT.

670 The slides were transferred to a humid chamber. Blocking solution (5% goat serum in PBST)  
671 was applied on the sections for 1 h at RT. Subsequently, sections were covered with approx.  
672 200  $\mu$ L of primary antibody diluted in blocking solution and incubated overnight at 4 °C in the  
673 humid chamber. They were washed in PBST in coplin jars for 1 h at RT and again transferred  
674 to the humid chamber for incubation with secondary antibodies diluted in blocking solution.  
675 The slides were washed in PBST for 1 h at RT and mounted in 90% glycerol in 20 mM Tris pH  
676 8 with 0.5% N-propyl gallate.



677 The following primary antibodies were used: mouse anti-tropomyosin at 1:100 (developed by  
678 J. Jung-Chin Lin and obtained from Developmental Studies Hybridoma Bank, CH1), rabbit  
679 anti-Ras at 1:500 (Abcam ab52939), rabbit anti-MCM5 at 1:500 (kindly provided by Soojin  
680 Ryu, Heidelberg), mouse anti-PCNA Clone PC10 (Dako, M0879) at 1:500 following antigen  
681 retrieval, mouse anti-embCMHC (N2.261) at 1:50 (developed by H.M. Blau, obtained from  
682 Developmental Studies Hybridoma Bank), guinea pig anti-ColXIIa (kindly provided by F.  
683 Ruggiero, Lyon, France), rat anti-RFP at 1:200 (5F8-10, Chromotek), rabbit Myl7 1:200 at  
684 (GTX128346, GeneTex), mouse anti-A4.1025 at (developed by H.M. Blau, obtained from  
685 Developmental Studies Hybridoma Bank), mouse anti-alpha-Actinin 1:200 at (A7811, Sigma),  
686 mouse anti-Myomesin (mMaC myomesin B4) at 1:50 (developed by J.-C. Perriard, obtained  
687 from Developmental Studies Hybridoma Bank), mouse anti-CoxIV (mitochondrial marker) at  
688 1:500 (ab33985, Abcam), rabbit anti-Porin/VDAC1 (ab15895, Abcam), rabbit anti-pS6  
689 ribosomal protein (phospho-Ser240/244; D68F8) at 1:2000 (5364, Cell Signaling Technology),  
690 chicken anti-L-plastin at 1:1000 (kindly provided by P. Martin, Bristol), rabbit anti-Mpx at  
691 1:500 (GTX128379, GeneTex).

692 The secondary antibodies (at 1:500) were Alexa conjugated (Jackson ImmunoResearch  
693 Laboratories). Phalloidin-CruzFluor-405 (sc-363790, Santa Cruz Biotechnology) were used at  
694 1:200 to label actin filaments. DAPI (Sigma) was applied to detect nuclei.

695

### 696 **Histological staining**

697 Aniline blue, acid Fuchsin and Orange-G (AFOG) triple staining was performed as previously  
698 described (Chablais et al., 2011). The imaging of heart sections was performed using a Zeiss  
699 Axioplan2 microscope.

700

### 701 **Quantitative real-time PCR**

702 Total RNA was isolated from pools of 6-10 dissected hearts of 4-OHT-treated *cmcl2/RFP* and  
703 *cmcl2/GFP-HRAS* juvenile fish that were homogenized in Qiazol (Qiagen) with a TissueLyser  
704 (Qiagen). RNA was extracted with the Direct-zol RNA Microprep kit (ZymoResearch)  
705 according to the manufacturer's instructions. RNA quality and concentration was determined  
706 using the 2200 TapeStation (Agilent). 1 ng of total RNA was used to synthesize amplified  
707 cDNA with the Ovation Pico WTA system V2 (NuGen, Tecan). Quantitative real-time PCR  
708 was performed using the KAPA SYBR Fast kit (KAPA biosystems) on a Rotor-Gene 6000  
709 thermocycler (Qiagen) according to the PCR kit manufacturer's instructions. All reactions were  
710 performed in technical duplicates and in 2-3 biological replicates. Relative expression levels

711 were determined using the 2- $\Delta\Delta$ Ct method and normalized to the expression of *poly(A)-binding*  
712 *protein c1a* (*pabpc1a*), a ubiquitously expressed housekeeping gene in metazoans, including  
713 zebrafish (Mishima et al., 2012; Wigington et al., 2014).

714 The following primers were used:

715 *pabpc1a* : Forward 5'-AAGTGTTTGTGGGTCGCTTC-3', Reverse 5'-  
716 CCTTCAGCTTCTCGTCATCC-3' (König and Jazwinska, 2019)

717 *tagln* : Forward 5'-GAGGACTCTGATGGCTCTGG-3' and reverse 5'-  
718 TTCTTGCCCTCCTTCATCTG-3'

719 *anln* : Forward 5'-GGTGCGTCCTTTCAGGATAC-3' and reverse 5'-  
720 CGACTGGTACAGTTGGCAAG-3'

721 *ankrd1a* : Forward 5'-GCTATCCAGCACTCCACTCC-3' and reverse 5'-  
722 TCTCCGTCCCTGTCTTTAGC-3'

723

724

## 725 **Imaging and statistical analysis**

726 Fluorescent images of sections were taken with a Leica confocal microscope (TCS SP5) and  
727 the image J 1.49c software was used for subsequent measurements. Live-images of larvae were  
728 taken with a Leica stereomicroscope.

729 The measurements of the larval standard length was performed by calculating the distance from  
730 the snout to the posterior tip of the notochord for each larvae, according to (Parichy et al., 2009).

731 The surface of the cardiac chambers was calculated by measuring the area of the ventricle and  
732 the atrium of dissected hearts.

733 For quantification of the myocardium or cavity density, we calculated the proportion of  
734 Tropomyosin-positive or Tropomyosin-negative area per total area of ventricular sections.

735 To quantify the proportion of proliferating cells in the ventricle, the images of the nuclear cell-  
736 cycle marker (MCM5) or PCNA were superimposed with the images of DAPI and  
737 Tropomyosin, which labels cardiomyocytes. For quantification of dedifferentiated  
738 cardiomyocytes, we calculated the proportion of immunostained area per ventricle labelled with  
739 either F-actin or cardiac myosin markers (Tropomyosin, Myl7, A4.1025,). For quantification  
740 of phagocytes, the L-plastin-positive area was normalized to the total area of the ventricular  
741 section.

742 Error bars correspond to standard error of the mean (SEM). Significance of differences was  
743 calculated using unpaired Student's t-test. Statistical analyses were performed with the  
744 GraphPad Prism software. All results are expressed as the mean  $\pm$  SEM.

745

746 **Competing interests**

747 The authors declare no financial or non-financial competing interests.

748

749 **Author's contributions:**

750 CP carried out lab work, performed data analysis and drafted the manuscript; MB, SR, JP and

751 DK carried out lab work, CP designed experiments, AJ designed and coordinated the study

752 and wrote the manuscript.

753

754 **Data availability**

755 The authors declare that all data supporting the findings of this study are available within the

756 article and its Supplemental Material files, or from the corresponding author upon request.

757

758 **Acknowledgments**

We thank V. Zimmermann for excellent technical assistance and for fish care. We are grateful to Prof. C. Lengerke (University of Basel) and Prof. M. Mione (University of Trento) for sharing transgenic fish lines, and for the initiation of this study. F. Ruggiero (Institut de Génomique Fonctionnelle de Lyon) for providing ColXII antibody and S. Ryu (IMB, Mainz) for MCM5 antibody. This work was supported by the Swiss National Science Foundation, grant number 310030\_179213, and by the Novartis Foundation for medical-biological research.

## References:

- Akerberg, A. A., Stewart, S. and Stankunas, K.** (2014). Spatial and temporal control of transgene expression in zebrafish. *PLoS One* **9**, e92217.
- Ali, H., Braga, L. and Giacca, M.** (2020). Cardiac regeneration and remodelling of the cardiomyocyte cytoarchitecture. *Febs j* **287**, 417-438.
- Arteel, G. E., Thurman, R. G., Yates, J. M. and Raleigh, J. A.** (1995). Evidence that hypoxia markers detect oxygen gradients in liver: pimonidazole and retrograde perfusion of rat liver. *British Journal of Cancer* **72**, 889-895.
- Asakawa, K., Suster, M. L., Mizusawa, K., Nagayoshi, S., Kotani, T., Urasaki, A., Kishimoto, Y., Hibi, M. and Kawakami, K.** (2008). Genetic dissection of neural circuits by Tol2 transposon-mediated Gal4 gene and enhancer trapping in zebrafish. *Proceedings of the National Academy of Sciences* **105**, 1255-1260.
- Azevedo, A. S., Grotek, B., Jacinto, A., Weidinger, G. and Saude, L.** (2011). The regenerative capacity of the zebrafish caudal fin is not affected by repeated amputations. *PLoS One* **6**, e22820.
- Bader, H. L., Keene, D. R., Charvet, B., Veit, G., Driever, W., Koch, M. and Ruggiero, F.** (2009). Zebrafish collagen XII is present in embryonic connective tissue sheaths (fascia) and basement membranes. *Matrix Biol* **28**, 32-43.
- Bevan, L., Lim, Z. W., Venkatesh, B., Riley, P. R., Martin, P. and Richardson, R. J.** (2020). Specific macrophage populations promote both cardiac scar deposition and subsequent resolution in adult zebrafish. *Cardiovascular Research* **116**, 1357-1371.
- Bise, T. and Jaźwińska, A.** (2019). Intrathoracic Injection for the Study of Adult Zebrafish Heart. *JoVE*, e59724.
- Bise, T., Sallin, P., Pfefferli, C. and Jaźwińska, A.** (2020). Multiple cryoinjuries modulate the efficiency of zebrafish heart regeneration. *Scientific Reports* **10**, 11551.
- Boilly, B., Faulkner, S., Jobling, P. and Hondermarck, H.** (2017). Nerve Dependence: From Regeneration to Cancer. *Cancer Cell* **31**, 342-354.
- Broughton, K. M., Wang, B. J., Firouzi, F., Khalafalla, F., Dimmeler, S., Fernandez-Aviles, F. and Sussman, M. A.** (2018). Mechanisms of Cardiac Repair and Regeneration. *Circ Res* **122**, 1151-1163.
- Bywater, M. J., Burkhart, D. L., Straube, J., Sabò, A., Pendino, V., Hudson, J. E., Quaife-Ryan, G. A., Porrello, E. R., Rae, J., Parton, R. G., et al.** (2020). Reactivation of Myc transcription in the mouse heart unlocks its proliferative capacity. *Nature Communications* **11**, 1827.
- Cai, C.-L. and Molkenin Jeffery, D.** (2017). The Elusive Progenitor Cell in Cardiac Regeneration. *Circ Res* **120**, 400-406.
- Chablais, F. and Jazwinska, A.** (2012). Induction of myocardial infarction in adult zebrafish using cryoinjury. *J Vis Exp*, e3666.
- Chablais, F., Veit, J., Rainer, G. and Jazwinska, A.** (2011). The zebrafish heart regenerates after cryoinjury-induced myocardial infarction. *BMC Dev Biol* **11**, 21.
- Charni, M., Aloni-Grinstein, R., Molchadsky, A. and Rotter, V.** (2017). p53 on the crossroad between regeneration and cancer. *Cell Death Differ* **24**, 8-14.
- Chávez, M. N., Morales, R. A., López-Crisosto, C., Roa, J. C., Allende, M. L. and Lavandero, S.** (2020). Autophagy Activation in Zebrafish Heart Regeneration. *Scientific Reports* **10**, 2191.

- Chen, E. Y. and Langenau, D. M.** (2011). Zebrafish models of rhabdomyosarcoma. *Methods Cell Biol* **105**, 383-402.
- Chiquet, M., Birk, D. E., Bonnemann, C. G. and Koch, M.** (2014). Collagen XII: Protecting bone and muscle integrity by organizing collagen fibrils. *Int J Biochem Cell Biol* **53**, 51-54.
- de Preux Charles, A. S., Bise, T., Baier, F., Marro, J. and Jazwinska, A.** (2016a). Distinct effects of inflammation on preconditioning and regeneration of the adult zebrafish heart. *Open Biol* **6**.
- de Preux Charles, A. S., Bise, T., Baier, F., Sallin, P. and Jazwinska, A.** (2016b). Preconditioning boosts regenerative programmes in the adult zebrafish heart. *Open Biol* **6**.
- Doppler, S. A., Deutsch, M.-A., Serpooshan, V., Li, G., Dzilic, E., Lange, R., Krane, M. and Wu, S. M.** (2017). Mammalian Heart Regeneration: The Race to the Finish Line. *Circ Res* **120**, 630-632.
- Dvorak, H. F.** (2015). Tumors: wounds that do not heal-redux. *Cancer Immunol Res* **3**, 1-11.
- Eguchi, G., Eguchi, Y., Nakamura, K., Yadav, M. C., Millán, J. L. and Tsonis, P. A.** (2011). Regenerative capacity in newts is not altered by repeated regeneration and ageing. *Nature Communications* **2**, 384.
- Felker, A. and Mosimann, C.** (2016). Contemporary zebrafish transgenesis with Tol2 and application for Cre/lox recombination experiments. *Methods Cell Biol* **135**, 219-244.
- Fernandez del Ama, L., Jones, M., Walker, P., Chapman, A., Braun, J. A., Mohr, J. and Hurlstone, A. F. L.** (2016). Reprofiling using a zebrafish melanoma model reveals drugs cooperating with targeted therapeutics. *Oncotarget* **7**, 40348-40361.
- Freedom, R. M., Lee, K. J., MacDonald, C. and Taylor, G.** (2000). Selected Aspects of Cardiac Tumors in Infancy and Childhood. *Pediatric Cardiology* **21**, 299-316.
- Gerety, S. S., Breau, M. A., Sasai, N., Xu, Q., Briscoe, J. and Wilkinson, D. G.** (2013). An inducible transgene expression system for zebrafish and chick. *Development* **140**, 2235-2243.
- Goldman, J. A., Kuzu, G., Lee, N., Karasik, J., Gemberling, M., Foglia, M. J., Karra, R., Dickson, A. L., Sun, F., Tolstorukov, M. Y., et al.** (2017). Resolving Heart Regeneration by Replacement Histone Profiling. *Developmental Cell* **40**, 392-404.e395.
- González-Rosa, J. M., Burns, C. E. and Burns, C. G.** (2017). Zebrafish heart regeneration: 15 years of discoveries. *Regeneration* **4**, 105-123.
- Gonzalez-Rosa, J. M., Martin, V., Peralta, M., Torres, M. and Mercader, N.** (2011). Extensive scar formation and regression during heart regeneration after cryoinjury in zebrafish. *Development* **138**, 1663-1674.
- González-Rosa, J. M., Sharpe, M., Field, D., Soonpaa, M. H., Field, L. J., Burns, C. E. and Burns, C. G.** (2018). Myocardial Polyploidization Creates a Barrier to Heart Regeneration in Zebrafish. *Developmental Cell* **44**, 433-446.e437.
- Gysin, S., Salt, M., Young, A. and McCormick, F.** (2011). Therapeutic Strategies for Targeting Ras Proteins. *Genes & Cancer* **2**, 359-372.
- Han, Y., Chen, A., Umansky, K.-B., Oonk, K. A., Choi, W.-Y., Dickson, A. L., Ou, J., Cigliola, V., Yifa, O., Cao, J., et al.** (2019). Vitamin D Stimulates Cardiomyocyte Proliferation and Controls Organ Size and Regeneration in Zebrafish. *Developmental Cell* **48**, 853-863.e855.

- Hapke, R. Y. and Haake, S. M.** (2020). Hypoxia-induced epithelial to mesenchymal transition in cancer. *Cancer Letters* **487**, 10-20.
- Haubner, B. J., Schneider, J., Schweigmann, U., Schuetz, T., Dichtl, W., Velik-Salchner, C., Stein, J.-I. and Penninger, J. M.** (2016). Functional Recovery of a Human Neonatal Heart After Severe Myocardial Infarction. *Circ Res* **118**, 216-221.
- Hesse, R. G., Kouklis, G. K., Ahituv, N. and Pomerantz, J. H.** (2015). The human ARF tumor suppressor senses blastema activity and suppresses epimorphic tissue regeneration. *eLife* **4**.
- Honkoop, H., de Bakker, D. E. M., Aharonov, A., Kruse, F., Shakked, A., Nguyen, P. D., de Heus, C., Garric, L., Muraro, M. J., Shoffner, A., et al.** (2019). Single-cell analysis uncovers that metabolic reprogramming by ErbB2 signaling is essential for cardiomyocyte proliferation in the regenerating heart. *eLife* **8**.
- Huang, W. C., Yang, C. C., Chen, I. H., Liu, Y. M., Chang, S. J. and Chuang, Y. J.** (2013). Treatment of Glucocorticoids Inhibited Early Immune Responses and Impaired Cardiac Repair in Adult Zebrafish. *PLoS One* **8**, e66613.
- Hussey, G. S., Dziki, J. L. and Badylak, S. F.** (2018). Extracellular matrix-based materials for regenerative medicine. *Nature Reviews Materials* **3**, 159-173.
- Jażwińska, A. and Blanchoud, S.** (2020). Towards deciphering variations of heart regeneration in fish. *Current Opinion in Physiology* **14**, 21-26.
- Jopling, C., Sleep, E., Raya, M., Marti, M., Raya, A. and Izpisua Belmonte, J. C.** (2010). Zebrafish heart regeneration occurs by cardiomyocyte dedifferentiation and proliferation. *Nature* **464**, 606-609.
- Jopling, C., Suñé, G., Faucherre, A., Fabregat, C. and Izpisua Belmonte, J. C.** (2012). Hypoxia induces myocardial regeneration in zebrafish. *Circulation* **126**, 3017-3027.
- Justus, C. R., Sanderlin, E. J. and Yang, L. V.** (2015). Molecular Connections between Cancer Cell Metabolism and the Tumor Microenvironment. *International journal of molecular sciences* **16**, 11055-11086.
- Keeton, A. B., Salter, E. A. and Piazza, G. A.** (2017). The RAS–Effector Interaction as a Drug Target. *Cancer Research* **77**, 221-226.
- Keightley, M.-C., Wang, C.-H., Pazhakh, V. and Lieschke, G. J.** (2014). Delineating the roles of neutrophils and macrophages in zebrafish regeneration models. *The International Journal of Biochemistry & Cell Biology* **56**, 92-106.
- Kikuchi, K.** (2015). Dedifferentiation, Transdifferentiation, and Proliferation: Mechanisms Underlying Cardiac Muscle Regeneration in Zebrafish. *Curr Pathobiol Rep* **3**, 81-88.
- Kikuchi, K., Holdway, J. E., Werdich, A. A., Anderson, R. M., Fang, Y., Egnaczyk, G. F., Evans, T., Macrae, C. A., Stainier, D. Y. and Poss, K. D.** (2010). Primary contribution to zebrafish heart regeneration by gata4(+) cardiomyocytes. *Nature* **464**, 601-605.
- König, D. and Jazwinska, A.** (2019). Zebrafish fin regeneration involves transient serotonin synthesis. *Wound Repair and Regeneration*.
- Lai, S.-L., Marín-Juez, R., Moura, P. L., Kuenne, C., Lai, J. K. H., Tseke, A. T., Guenther, S., Looso, M. and Stainier, D. Y. R.** (2017). Reciprocal analyses in zebrafish and medaka reveal that harnessing the immune response promotes cardiac regeneration. *eLife* **6**.
- Le, X., Pugach, E. K., Hettmer, S., Storer, N. Y., Liu, J., Wills, A. A., DiBiase, A., Chen, E. Y., Ignatius, M. S., Poss, K. D., et al.** (2013). A novel chemical screening strategy in zebrafish identifies common pathways in embryogenesis and rhabdomyosarcoma development. *Development* **140**, 2354-2364.



- Li, S., Balmain, A. and Counter, C. M.** (2018). A model for RAS mutation patterns in cancers: finding the sweet spot. *Nature Reviews Cancer* **18**, 767-777.
- Lieschke, G. J. and Currie, P. D.** (2007). Animal models of human disease: zebrafish swim into view. *Nature Reviews Genetics* **8**, 353-367.
- Lu, P., Weaver, V. M. and Werb, Z.** (2012). The extracellular matrix: A dynamic niche in cancer progression. *The Journal of Cell Biology* **196**, 395-406.
- MacRae, C. A. and Peterson, R. T.** (2015). Zebrafish as tools for drug discovery. *Nature Reviews Drug Discovery* **14**, 721-731.
- Magaway, C., Kim, E. and Jacinto, E.** (2019). Targeting mTOR and Metabolism in Cancer: Lessons and Innovations. *Cells* **8**, 1584.
- Maleszewski, J. J., Anavekar, N. S., Moynihan, T. J. and Klarich, K. W.** (2017). Pathology, imaging, and treatment of cardiac tumours. *Nat Rev Cardiol* **14**, 536-549.
- Mantovani, A., Allavena, P., Sica, A. and Balkwill, F.** (2008). Cancer-related inflammation. *Nature* **454**, 436.
- Marro, J., Pfefferli, C., de Preux Charles, A. S., Bise, T. and Jazwinska, A.** (2016). Collagen XII Contributes to Epicardial and Connective Tissues in the Zebrafish Heart during Ontogenesis and Regeneration. *PLoS One* **11**, e0165497.
- Mayrhofer, M., Gourain, V., Reischl, M., Affaticati, P., Jenett, A., Joly, J.-S., Benelli, M., Demichelis, F., Poliani, P. L., Sieger, D., et al.** (2017). A novel brain tumour model in zebrafish reveals the role of YAP activation in MAPK- and PI3K-induced malignant growth. *Disease Models & Mechanisms* **10**, 15-28.
- Mayrhofer, M. and Mione, M.** (2016). The Toolbox for Conditional Zebrafish Cancer Models. **916**, 21-59.
- Milanovic, M., Yu, Y. and Schmitt, C. A.** (2018). The Senescence-Stemness Alliance - A Cancer-Hijacked Regeneration Principle. *Trends Cell Biol* **28**, 1049-1061.
- Mishima, Y., Fukao, A., Kishimoto, T., Sakamoto, H., Fujiwara, T. and Inoue, K.** (2012). Translational inhibition by deadenylation-independent mechanisms is central to microRNA-mediated silencing in zebrafish. *Proceedings of the National Academy of Sciences* **109**, 1104-1109.
- Mollova, M., Bersell, K., Walsh, S., Savla, J., Das, L. T., Park, S. Y., Silberstein, L. E., Dos Remedios, C. G., Graham, D., Colan, S., et al.** (2013). Cardiomyocyte proliferation contributes to heart growth in young humans. *Proc Natl Acad Sci U S A* **110**, 1446-1451.
- Morley, S. C.** (2012). The actin-bundling protein L-plastin: a critical regulator of immune cell function. *Int J Cell Biol* **2012**, 935173.
- Oviedo, N. J. and Beane, W. S.** (2009). Regeneration: The origin of cancer or a possible cure? *Seminars in cell & developmental biology* **20**, 557-564.
- Parichy, D. M., Elizondo, M. R., Mills, M. G., Gordon, T. N. and Engeszer, R. E.** (2009). Normal table of postembryonic zebrafish development: Staging by externally visible anatomy of the living fish. *Developmental Dynamics* **238**, 2975-3015.
- Pfefferli, C. and Jaźwińska, A.** (2017). The careg element reveals a common regulation of regeneration in the zebrafish myocardium and fin. *Nature Communications* **8**, 15151.
- Pomerantz, J. H. and Blau, H. M.** (2013). Tumor suppressors: enhancers or suppressors of regeneration? *Development* **140**, 2502.
- Porta, C., Paglino, C. and Mosca, A.** (2014). Targeting PI3K/Akt/mTOR Signaling in Cancer. *Front Oncol* **4**.

- Pronobis, M. I. and Poss, K. D.** (2020). Signals for cardiomyocyte proliferation during zebrafish heart regeneration. *Curr Opin Physiol* **14**, 78-85.
- Redd, M. J., Kelly, G., Dunn, G., Way, M. and Martin, P.** (2006). Imaging macrophage chemotaxis in vivo: Studies of microtubule function in zebrafish wound inflammation. *Cell Motility and the Cytoskeleton* **63**, 415-422.
- Ribatti, D. and Tamma, R.** (2018). A revisited concept. Tumors: Wounds that do not heal. *Critical Reviews in Oncology/Hematology* **128**, 65-69.
- Rojas-Muñoz, A., Rajadhyksha, S., Gilmour, D., van Bebber, F., Antos, C., Rodríguez Esteban, C., Nüsslein-Volhard, C. and Izpisua Belmonte, J. C.** (2009). ErbB2 and ErbB3 regulate amputation-induced proliferation and migration during vertebrate regeneration. *Developmental Biology* **327**, 177-190.
- Rottbauer, W., Saurin, A. J., Lickert, H., Shen, X., Burns, C. G., Wo, Z. G., Kemler, R., Kingston, R., Wu, C. and Fishman, M.** (2002). Reptin and pontin antagonistically regulate heart growth in zebrafish embryos. *Cell* **111**, 661-672.
- Ryu, S. and Driever, W.** (2014). Minichromosome Maintenance Proteins as Markers for Proliferation Zones During Embryogenesis. *Cell Cycle* **5**, 1140-1142.
- Sallin, P., de Preux Charles, A. S., Duruz, V., Pfefferli, C. and Jazwinska, A.** (2015). A dual epimorphic and compensatory mode of heart regeneration in zebrafish. *Dev Biol* **399**, 27-40.
- Sánchez-Iranzo, H., Galardi-Castilla, M., Minguillón, C., Sanz-Morejón, A., González-Rosa, J. M., Felker, A., Ernst, A., Guzmán-Martínez, G., Mosimann, C. and Mercader, N.** (2018). Tbx5a lineage tracing shows cardiomyocyte plasticity during zebrafish heart regeneration. *Nature Communications* **9**.
- Sande-Melón, M., Marques, I. J., Galardi-Castilla, M., Langa, X., Pérez-López, M., Botos, M.-A., Sánchez-Iranzo, H., Guzmán-Martínez, G., Ferreira Francisco, D. M., Pavlinic, D., et al.** (2019). Adult sox10+ Cardiomyocytes Contribute to Myocardial Regeneration in the Zebrafish. *Cell Reports* **29**, 1041-1054.e1045.
- Santoriello, C., Deflorian, G., Pezzimenti, F., Kawakami, K., Lanfrancone, L., d'Adda di Fagnana, F. and Mione, M.** (2009). Expression of H-RASV12 in a zebrafish model of Costello syndrome causes cellular senescence in adult proliferating cells. *Disease Models and Mechanisms* **2**, 56-67.
- Santoriello, C. and Zon, L. I.** (2012). Hooked! Modeling human disease in zebrafish. *Journal of Clinical Investigation* **122**, 2337-2343.
- Sanz-Morejón, A. and Mercader, N.** (2020). Recent insights into zebrafish cardiac regeneration. *Curr Opin Genet Dev* **64**, 37-43.
- Sarig, R., Rimmer, R., Bassat, E., Zhang, L., Umansky, K. B., Lendengolts, D., Perlmoter, G., Yaniv, K. and Tzahor, E.** (2019). Transient p53-Mediated Regenerative Senescence in the Injured Heart. *Circulation* **139**, 2491-2494.
- Sarig, R. and Tzahor, E.** (2017). The cancer paradigms of mammalian regeneration: can mammals regenerate as amphibians? *Carcinogenesis* **38**, 359-366.
- Schnabel, K., Wu, C. C., Kurth, T. and Weidinger, G.** (2011). Regeneration of cryoinjury induced necrotic heart lesions in zebrafish is associated with epicardial activation and cardiomyocyte proliferation. *PLoS One* **6**, e18503.
- Shaw, R. J. and Cantley, L. C.** (2006). Ras, PI(3)K and mTOR signalling controls tumour cell growth. *Nature* **441**, 424-430.

- Shoffner, A., Cigliola, V., Lee, N., Ou, J. and Poss, K. D.** (2020). Tp53 Suppression Promotes Cardiomyocyte Proliferation during Zebrafish Heart Regeneration. *Cell Reports* **32**, 108089.
- Simanshu, D. K., Nissley, D. V. and McCormick, F.** (2017). RAS Proteins and Their Regulators in Human Disease. *Cell* **170**, 17-33.
- Simkin, J. and Seifert, A. W.** (2018). Concise Review: Translating Regenerative Biology into Clinically Relevant Therapies: Are We on the Right Path? *Stem Cells Transl Med* **7**, 220-231.
- Simões, F. C., Cahill, T. J., Kenyon, A., Gavriouchkina, D., Vieira, J. M., Sun, X., Pezzolla, D., Ravaut, C., Masmanian, E., Weinberger, M., et al.** (2020). Macrophages directly contribute collagen to scar formation during zebrafish heart regeneration and mouse heart repair. *Nature Communications* **11**, 600.
- Sousounis, K., Bryant, D. M., Martinez Fernandez, J., Eddy, S. S., Tsai, S. L., Gundberg, G. C., Han, J., Courtemanche, K., Levin, M. and Whited, J. L.** (2020). Eya2 promotes cell cycle progression by regulating DNA damage response during vertebrate limb regeneration. *eLife* **9**, e51217.
- Stewart, R., Rascón, C. A., Tian, S., Nie, J., Barry, C., Chu, L.-F., Ardalani, H., Wagner, R. J., Probasco, M. D., Bolin, J. M., et al.** (2013). Comparative RNA-seq Analysis in the Unsequenced Axolotl: The Oncogene Burst Highlights Early Gene Expression in the Blastema. *PLoS Computational Biology* **9**.
- Stiehl, T. and Marciniak-Czochra, A.** (2017). Stem cell self-renewal in regeneration and cancer: Insights from mathematical modeling. *Current Opinion in Systems Biology* **5**, 112-120.
- Storer, N. Y., White, R. M., Uong, A., Price, E., Nielsen, G. P., Langenau, D. M. and Zon, L. I.** (2013). Zebrafish rhabdomyosarcoma reflects the developmental stage of oncogene expression during myogenesis. *Development* **140**, 3040.
- Sun, X., Hoage, T., Bai, P., Ding, Y., Chen, Z., Zhang, R., Huang, W., Jahangir, A., Paw, B., Li, Y.-G., et al.** (2009). Cardiac hypertrophy involves both myocyte hypertrophy and hyperplasia in anemic zebrafish. *PLoS One* **4**, e6596-e6596.
- Sundaram, G. M., Quah, S. and Sampath, P.** (2018). Cancer: the dark side of wound healing. *Febs j* **285**, 4516-4534.
- Sunderland, M. E.** (2010). Regeneration: Thomas Hunt Morgan's Window into Development. *Journal of the History of Biology* **43**, 325-361.
- Tanaka, E. M.** (2016). The Molecular and Cellular Choreography of Appendage Regeneration. *Cell* **165**, 1598-1608.
- Tata, P. R. and Rajagopal, J.** (2016). Cellular plasticity: 1712 to the present day. *Current Opinion in Cell Biology* **43**, 46-54.
- Tomasetti, C. and Vogelstein, B.** (2015). Cancer etiology. Variation in cancer risk among tissues can be explained by the number of stem cell divisions. *Science (New York, N.Y.)* **347**, 78-81.
- Tzahor, E. and Poss, K. D.** (2017). Cardiac regeneration strategies: Staying young at heart. *Science* **356**, 1035-1039.
- Uygur, A. and Lee, Richard T.** (2016). Mechanisms of Cardiac Regeneration. *Developmental Cell* **36**, 362-374.
- Uzun, O., Wilson, D. G., Vujanic, G. M., Parsons, J. M. and De Giovanni, J. V.** (2007). Cardiac tumours in children. *Orphanet journal of rare diseases* **2**, 11-11.

- Wigington, C. P., Williams, K. R., Meers, M. P., Bassell, G. J. and Corbett, A. H.** (2014). Poly(A) RNA-binding proteins and polyadenosine RNA: new members and novel functions. *Wiley Interdiscip Rev RNA* **5**, 601-622.
- Willet, S. G., Lewis, M. A., Miao, Z. F., Liu, D., Radyk, M. D., Cunningham, R. L., Burclaff, J., Sibbel, G., Lo, H. G., Blanc, V., et al.** (2018). Regenerative proliferation of differentiated cells by mTORC1-dependent paligenosis. *Embo j* **37**.
- Wills, A. A., Holdway, J. E., Major, R. J. and Poss, K. D.** (2008). Regulated addition of new myocardial and epicardial cells fosters homeostatic cardiac growth and maintenance in adult zebrafish. *Development* **135**, 183-192.
- Wong, A. Y. and Whited, J. L.** (2020). Parallels between wound healing, epimorphic regeneration and solid tumors. *Development* **147**, dev181636.
- Wu, C. C., Kruse, F., Vasudevarao, M. D., Junker, J. P., Zebrowski, D. C., Fischer, K., Noel, E. S., Grun, D., Berezikov, E., Engel, F. B., et al.** (2016). Spatially Resolved Genome-wide Transcriptional Profiling Identifies BMP Signaling as Essential Regulator of Zebrafish Cardiomyocyte Regeneration. *Dev Cell* **36**, 36-49.
- Xiong, Q., Liu, B., Ding, M., Zhou, J., Yang, C. and Chen, Y.** (2020). Hypoxia and cancer related pathology. *Cancer Letters* **486**, 1-7.
- Yun, M. H., Davaapil, H. and Brockes, J. P.** (2015). Recurrent turnover of senescent cells during regeneration of a complex structure. *eLife* **4**.
- Yun, M. H., Gates, P. B. and Brockes, J. P.** (2013). Regulation of p53 is critical for vertebrate limb regeneration. *Proc Natl Acad Sci U S A* **110**, 17392-17397.
- Zhou, B., Der, C. J. and Cox, A. D.** (2016). The role of wild type RAS isoforms in cancer. *Seminars in Cell & Developmental Biology* **58**, 60-69.



Figures:

Figure 1

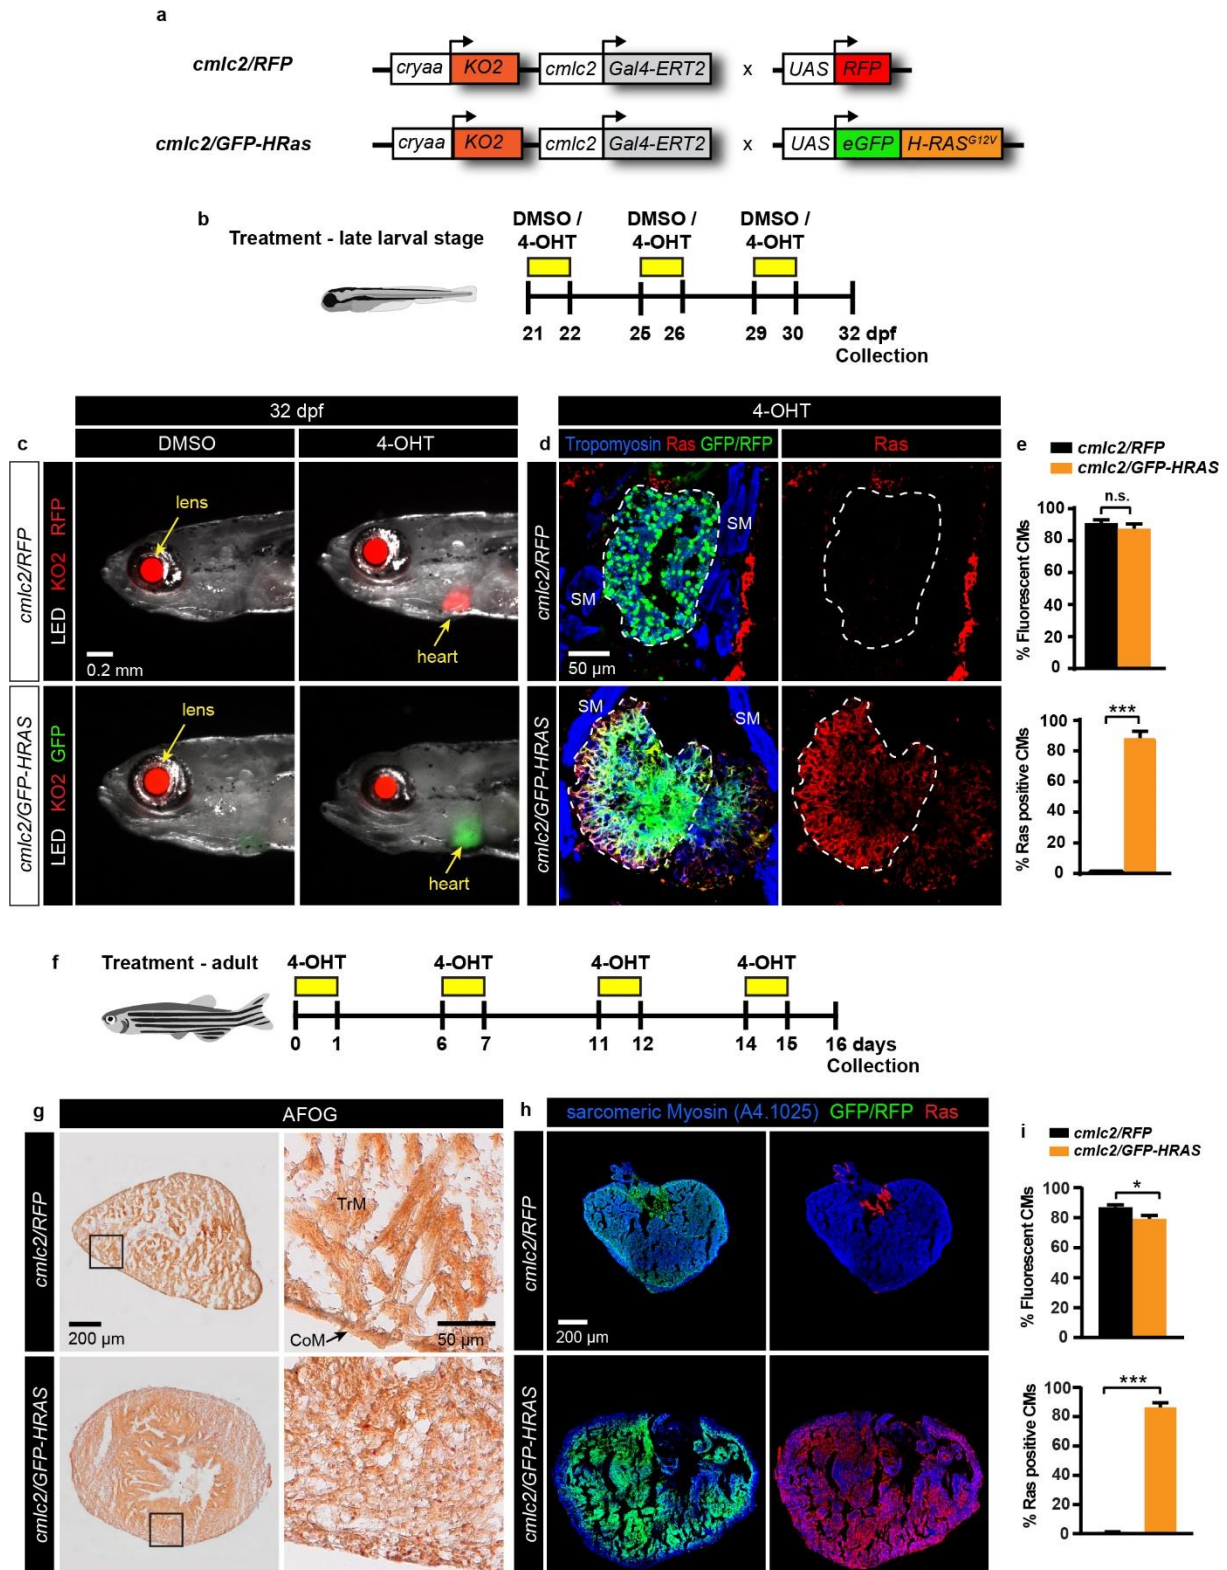

**Figure 1. Inducible oncogene expression using the Gal4-ERT2 system in the larval and adult zebrafish heart.**

**a**, Schematic representation of the transgenic strains used for inducible expression of oncogenic HRAS in the heart. The construct with *cmlc2:Gal4-ERT2* is linked to a lens marker, *cryaa:KO2*, to facilitate identification of transgenic fish. These fish were crossed with either *UAS:mRFP1* (*cmlc2/RFP*, control) or *UAS:eGFP-HRAS<sup>G12V</sup>* (*cmlc2/GFP-HRAS*, oncogenic form of HRAS fused with eGFP).

**b**, Design of the experiment with three pulses of 3  $\mu$ M hydroxytamoxifen (4-OHT) or 0.05% DMSO treatment at the post-embryonic stage (named late larval stage). Overnight 4-OHT pulse treatments were performed at 21, 25 and 29 dpf, followed by the analysis at 32 dpf.

**c**, Overlaid photographs of the anterior part of zebrafish larvae illuminated with LED and UV light in combination with GFP and RFP filters. The red fluorescence in the eye lens is used as a linked marker of the *cmlc2:Gal4-ERT2* transgene. DMSO-treated fish do not display any fluorescence in the heart, consistent with a lack of Gal4-ERT2 activity. The hearts express fluorescent proteins only after 4-OHT treatment.

**d**, Immunofluorescence staining of larval heart sections after 4-OHT treatment. RFP (green) or GFP (green) expression in *cmlc2/RFP* and *cmlc2/GFP-HRAS* hearts respectively, reveal the activation of the Gal4-ERT2/UAS system in the myocardium, labelled with Tropomyosin (blue). Ras (red) is expressed only in hearts of *cmlc2/GFP-HRAS* fish. The ventricular area is encircled with a dashed line. Tropomyosin-positive skeletal muscle (SM) fibers are present in the proximity of the heart.

**e**, Quantification of immunofluorescence analysis shown in images representatively shown in d. RFP or GFP fluorescent proteins were induced in a high proportion of cardiomyocytes, which were identified by Tropomyosin labeling. Ras expression was induced only *cmlc2/GFP-HRAS* hearts. \*\*\*  $P < 0.0001$ , n.s.= not significant, n = 8 (*cmlc2/RFP*), n = 3 (*cmlc2/GFP-HRAS*).

**f**, Experimental design with four pulses of 2.5  $\mu$ M hydroxytamoxifen (4-OHT) or 0.05% DMSO treatment over 16 days at the adult stage. *cmlc2/RFP* and *cmlc2/GFP-HRAS* adult fish between 6-8 months were used. Overnight 4-OHT pulse treatments were performed at day 0, 6, 11 and 14, followed by the analysis at day 16 of the treatment.

**g**, Histological staining with the AFOG reagent showing the myocardium (beige), fibrin (red) and collagen (blue) in adult heart sections reveals the morphology of *cmlc2/RFP* and *cmlc2/GFP-HRAS* hearts after 4-OHT treatment. While control hearts contain typical slender



myocardial fascicles of the trabecular myocardium with luminal cavities, *cmlc2/GFP-HRAS* hearts show a disorganized arrangement of myocardial cells with an abnormal shape.

**h**, Immunofluorescence staining of adult heart sections shows the induction of the fluorescent proteins RFP (green) or GFP (green) in the adult myocardium labelled with Tropomyosin (blue). Ras expression (red) is induced in the whole myocardium of *cmlc2/GFP-HRAS* fish, whereas it is detected only in the connective tissue of the valve in control *cmlc2/RFP* hearts.

**h**, Quantification of immunofluorescence analysis showing the proportion of RFP/GFP- and Ras-expressing cardiomyocytes (CMs) in *cmlc2/RFP* and *cmlc2/GFP-HRAS* ventricles. \*  $P < 0.05$ , \*\*\*  $P < 0.0001$ ,  $n = 5$ .

Figure 2

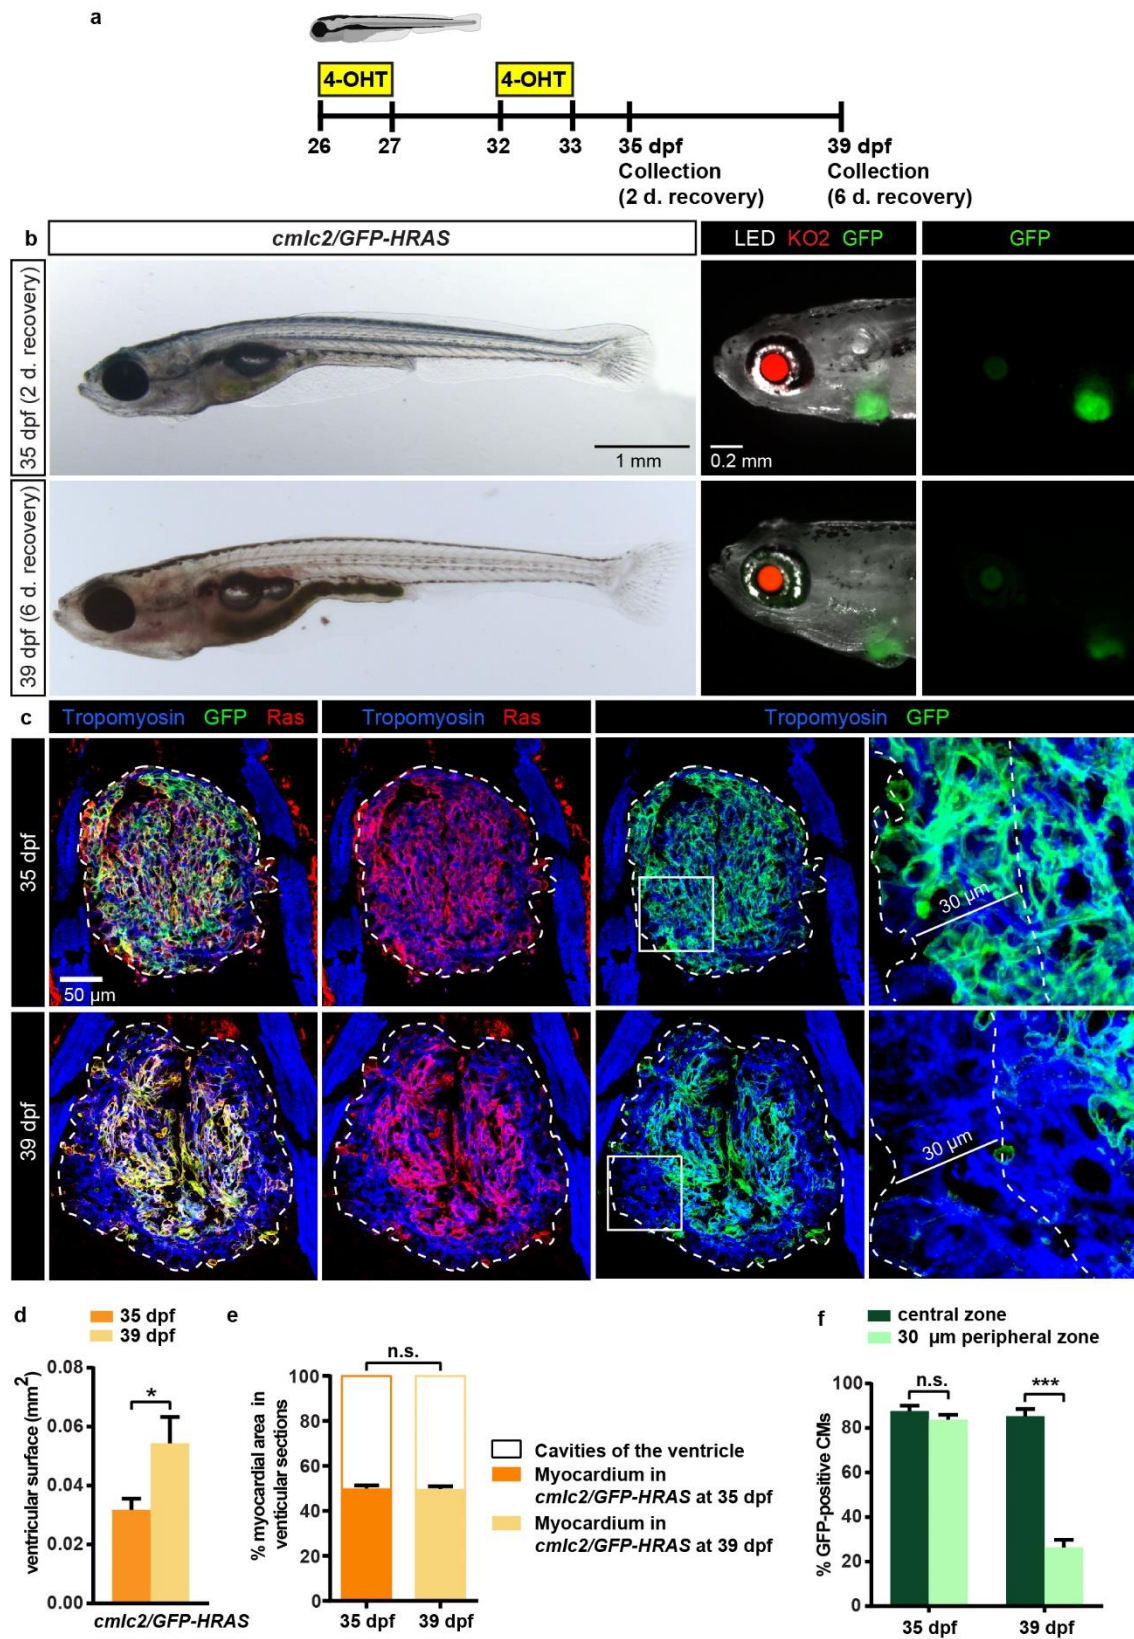

**Figure 2. Monitoring the effects of 4-OHT treatment withdrawal on induced oncogene expression.**

**a**, Experimental design with two pulses of overnight 4-OHT treatment at 26 and 32 dpf, followed by either 2 or 6 days of recovery at normal conditions.

**b**, Images of live fish at the end of the experiment. The photographs of the larval anterior part using a combination of LED and UV light with GFP filters shows a reduced fluorescence in the hearts after 6-day-recovery as compared to the fish at 2 day-recovery.

**c**, Immunofluorescence staining of heart sections after 2 and 6 day-recovery using Tropomyosin (blue), GFP (green) and Ras (red) antibodies. At 39 dpf (6 day-recovery) the peripheral myocardium in a 30  $\mu\text{m}$ -wide zone from the ventricular margin (shown with a dashed line in the higher magnification of the framed area) expresses markedly less GFP and Ras. The ventricular area is encircled with a dashed line.

**d**, Quantification of the ventricular area in heart sections.

**e**, The proportion of the Tropomyosin-positive area in the ventricular sections indicates the level of myocardial compaction.

**f**, Proportion of GFP-positive cardiomyocytes (CMs) in a 30  $\mu\text{m}$ -wide peripheral margin of the ventricle and in the remaining myocardium, referred to as the central zone. \*  $P < 0.05$ , \*\*\*  $P < 0.0001$ , n.s. = not significant, n = 5 (35 dpf), n = 4 (39 dpf).

Figure 3

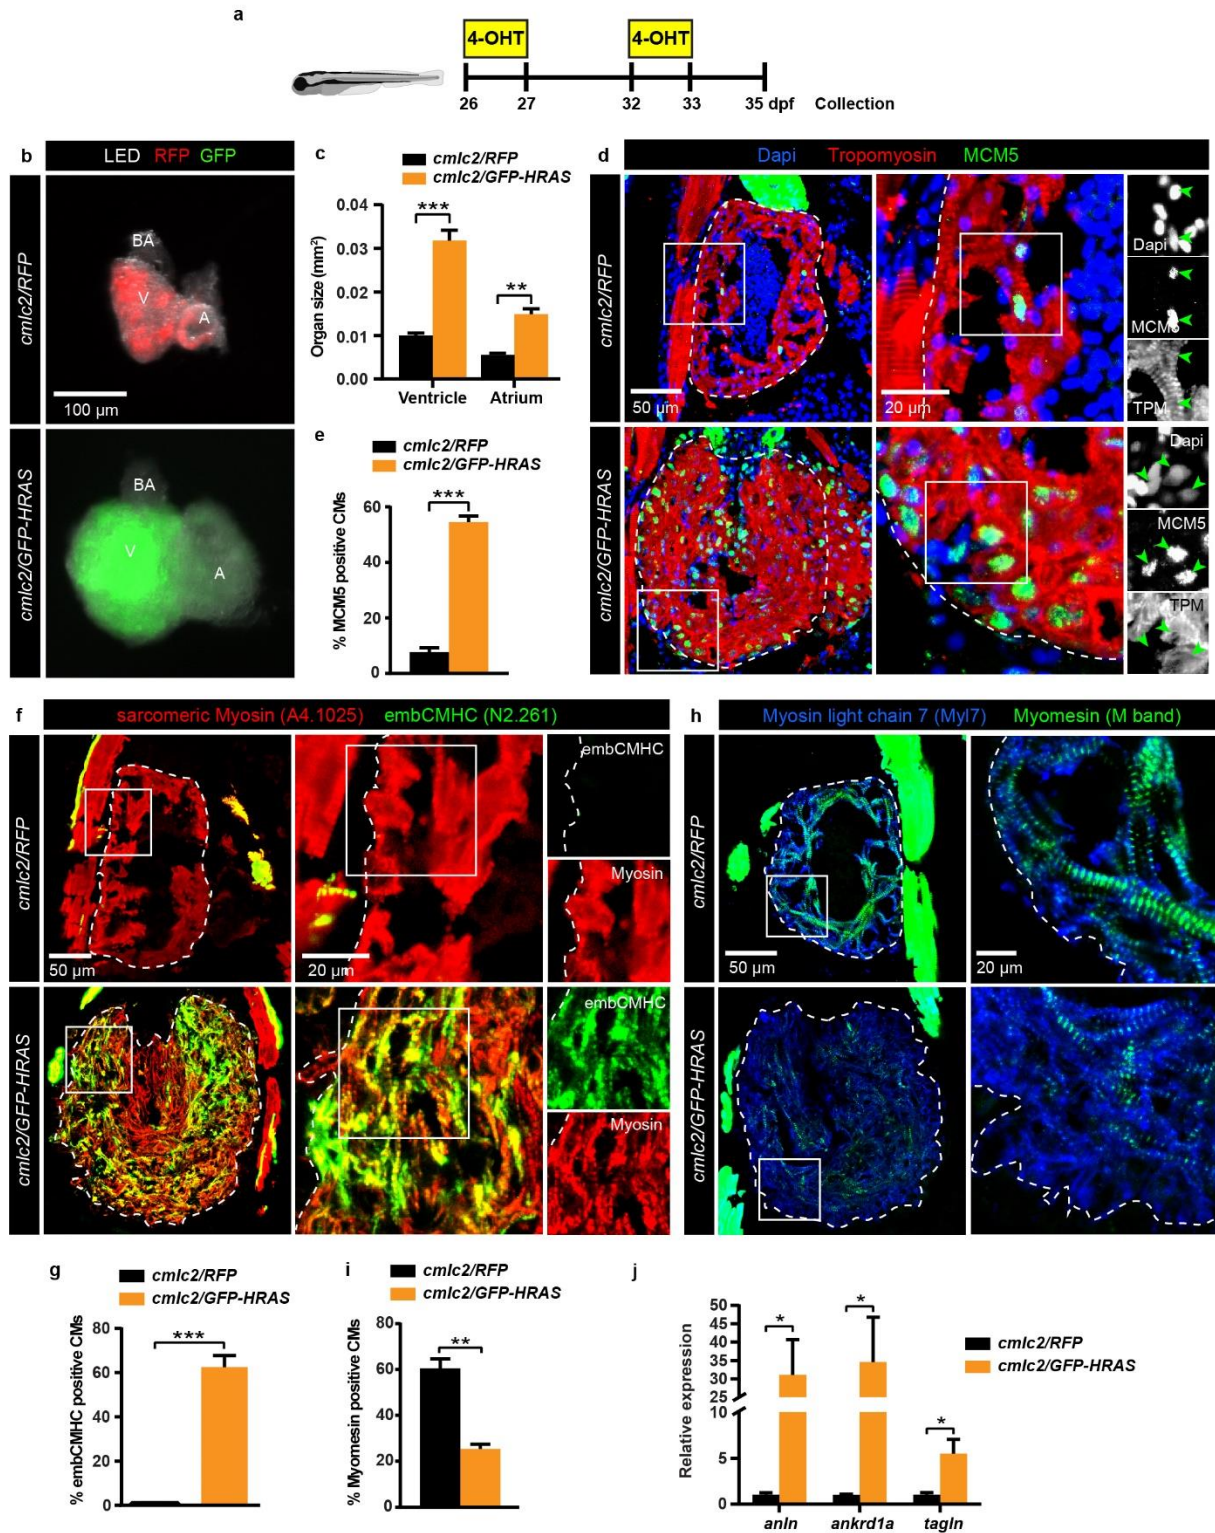



**Figure 3. HRAS-transformed cardiomyocytes are hyper-proliferative and display differentiation defects.**

**a**, Experimental design with two pulses of 4-OHT treatment at 26 and 32 dpf, followed by 2 days of recovery.

**b**, Dissected unfixed hearts illuminated with LED and UV light with RFP (red) or GFP (green) filters. The ventricle (V) and the atrium (A) is markedly enlarged in *cmlc2/GFP-HRAS* compared to *cmlc2/RFP* hearts. BA, bulbus arteriosus.

**c**, Quantification of the ventricular and atrial surface based on photographs of dissected hearts representatively shown in **b**. \*\*\*  $P < 0.0001$ , \*\*  $P < 0.001$ ,  $n = 7$  (*cmlc2/RFP*),  $n = 10$  (*cmlc2/GFP-HRAS*).

**d**, Larval heart sections immunostained for the G1/S-phase cell cycle marker MCM5 (green) and Tropomyosin (red). Proliferating cells of the myocardium were visualized by colocalization between MCM5, Tropomyosin and Dapi (green arrows in the black and white panels). The ventricular area is encircled with a dashed line.

**e**, Proportion of DAPI/MCM5-positive cells within the Tropomyosin-positive areas of the ventricular section. \*\*\*  $P < 0.0001$ ,  $n = 6$ .

**f**, Larval heart sections immunostained with the pan-skeletal myosin antibody A4.1025 (red) and an antibody that detects embryonic isoform of cardiac myosin, N2.261 (embCMHC, green). Control *cmlc2/RFP* ventricles do not display any N2.261 immunoreactivity, whereas embCMHC expression is highly induced in *cmlc2/GFP-HRAS* ventricles.

**g**, Proportion of embCMHC/A4.1025-double positive area within the A4.1025-labeled myocardium. \*\*\*  $P < 0.0001$ ,  $n = 7$ .

**h**, Immunofluorescence staining of hearts using antibodies against Myomesin (M-Band marker, green) and Myosin light chain 7 (Myl7, blue). *cmlc2/GFP-HRAS* ventricles contain less Myomesin staining than *cmlc2/RFP* ventricles.

**i**, Proportion of Myomesin within the Myl7-positive myocardium. \*\*  $P < 0.001$ ,  $n = 5$  (*cmlc2/RFP*),  $n = 8$  (*cmlc2/GFP-HRAS*).

**j**, RT-PCR analysis of the regeneration-responsive markers *anln*, *anrkd1a* and *tagln* in 4-OHT-treated *cmlc2/RFP* and *cmlc2/GFP-HRAS* larval hearts.  $n \geq 2$  sets, 6-10 hearts each, \*  $P < 0.05$ .

Figure 4

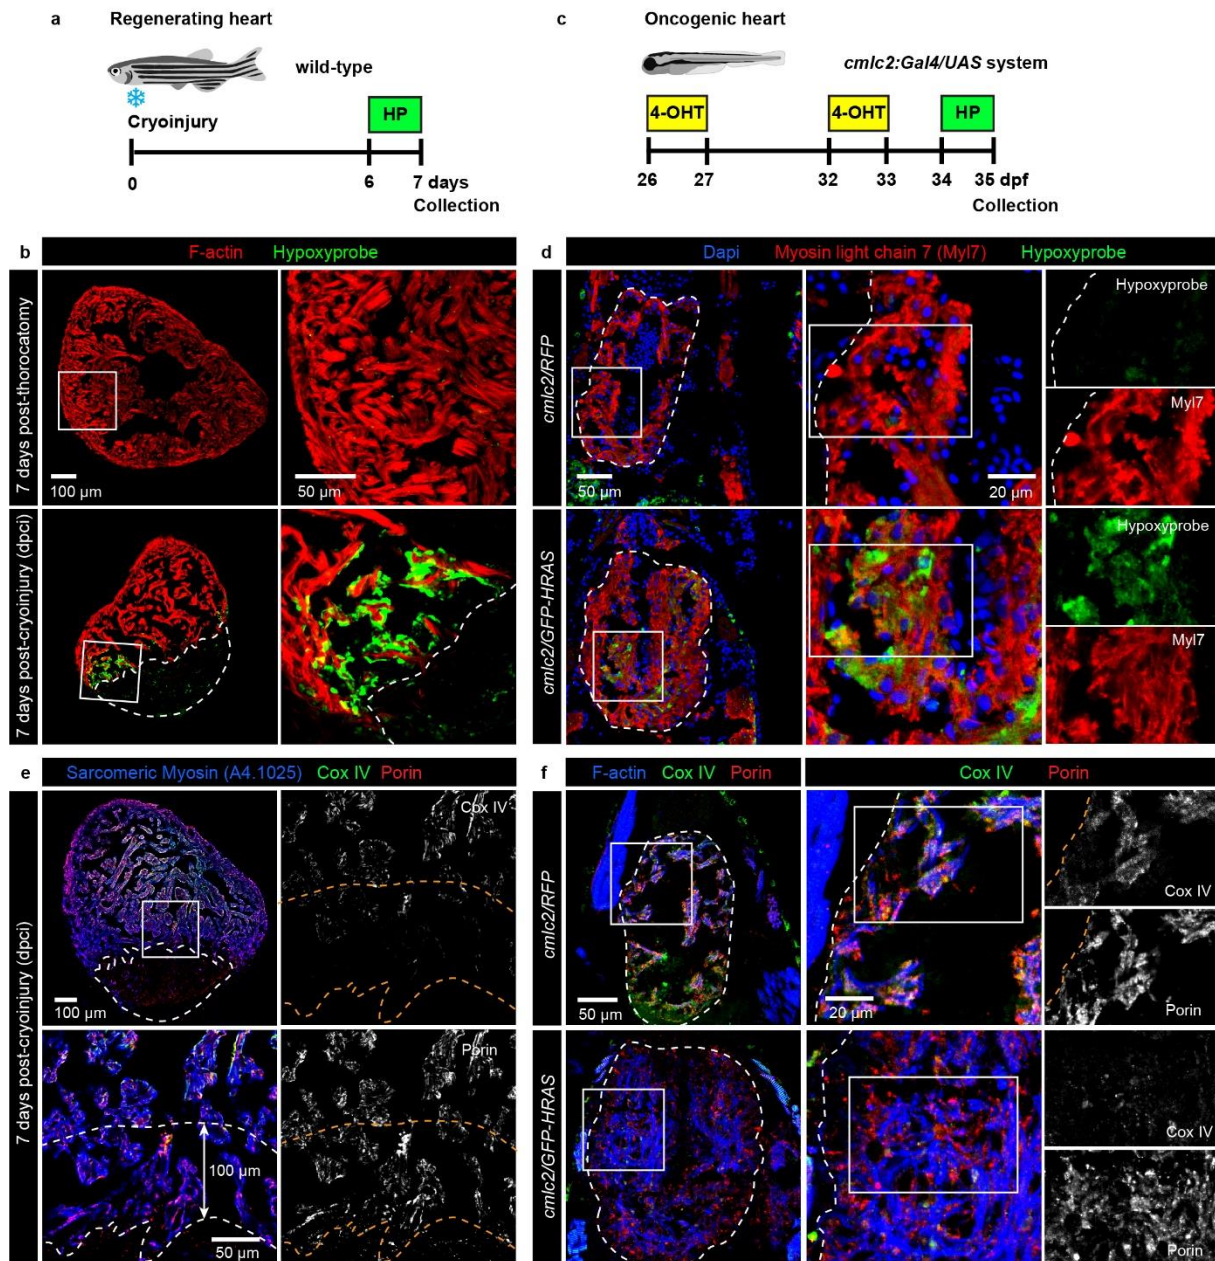

**Figure 4. Hypoxia and mitochondrial metabolic modification are induced in regenerating and neoplastic cardiomyocytes.**

**a**, Experimental design with 1 day of incubation with hypoxypromide (pimonidazole hydrochloride) at 6 to 7 days after cryoinjury or after thoracotomy in adult zebrafish.

**b**, Ventricle sections at 7 days post-thoracotomy or post-cryoinjury (dpci) immunostained for hypoxypromide (green). The myocardium is marked by Phalloidin staining (F-actin, red). Dashed lines encircle the cryoinjured part. Control hearts at 7 days post-thoracotomy do not display any



hypoxyprom immunoreactivity. Hypoxia is detected in the peri-injured myocardium at 7 dpci. n = 3.

**c**, Experimental design. Larvae were treated with two pulses of 4-OHT at 26 and 32 dpf, followed by 1 day of hypoxyprom incubation at 33 dpf.

**d**, Larval heart sections immunostained with antibodies against hypoxyprom (green) and Myosin light chain 7 (Myl7, red). The ventricular area is encircled with a dashed line. Hypoxia is highly induced in *cmlc2/GFP-HRAS* ventricles compared to control *cmlc2/RFP* hearts. n = 4.

**e-f**, Immunofluorescence staining using antibodies against the mitochondrial cytochrome c oxidase IV (Cox IV, green) and the structural channel protein Porin/VDAC1.

**e**, In adult regenerating hearts at 7 dpci, the intensity of Cox-IV staining is reduced in the peri-injury zone highlighted by a 100  $\mu$ m-wide margin of the myocardium along the injury border. Porin/VDAC1 staining is uniform throughout the entire myocardium, which is labeled with the pan-skeletal myosin antibody A4.1025 (blue). Dashed lines encircle the cryoinjured part and the peri-injury zone. n = 4.

**f**, In 4-OHT treated larvae, Cox IV expression is reduced in *cmlc2/GFP-HRAS* hearts compared to control, whereas no changes in Porin/VDAC1 expression is observed. The myocardium is marked by Phalloidin staining (F-actin, blue). n = 5.

Figure 5

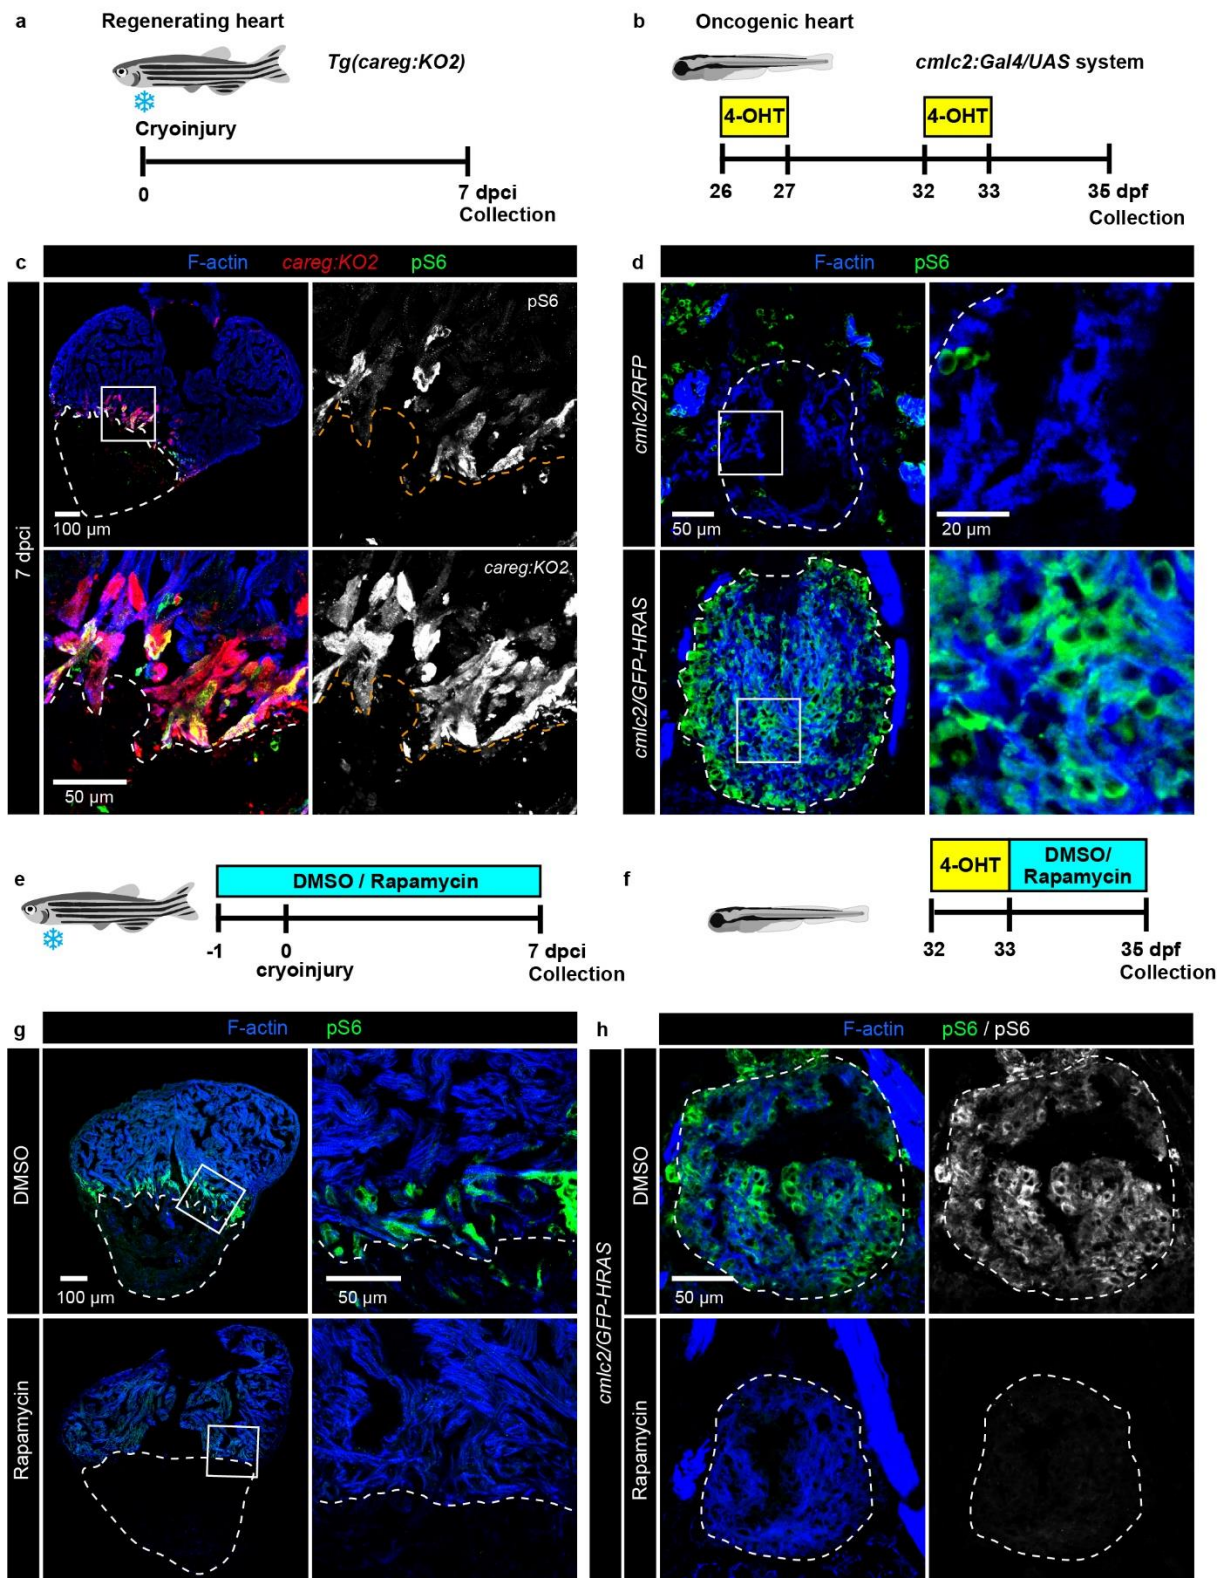

**Figure 5. The TOR pathway is activated in HRAS-induced neoplasia and heart regeneration.**

**a-b**, Experimental design for heart regeneration in adult zebrafish (a) and for induced cardiac neoplasia in larvae (b).

**c-d**, Immunofluorescence staining with antibodies against the phosphorylated ribosomal protein pS6 (green), which is used as a downstream marker of TOR signaling.

**c**, At 7 dpci, pS6 is strongly induced in the peri-injured myocardium which is labelled by transgenic *careg:dmKO2* expression (red). n = 4.

**d**, In neoplastic larval heart, pS6 immunoreactivity is strongly detected in the whole myocardium of *cmlc2/GFP-HRAS*, while control *cmlc2/RFP* display low pS6 labeling. n=4

**e-f**, Experimental design of rapamycin treatment in adult fish after cryoinjury (e) and in larvae after induced cardiac neoplasia (f).

**g-h**, Immunofluorescence staining for pS6 (green) after rapamycin treatment.

**g**, At 7 dpci, rapamycin treatment suppresses pS6 staining in the peri-injured myocardium. n = 5.

**h**, In *cmlc2/GFP-HRAS* larvae, a short rapamycin treatment of 2 days blocks pS6 immunoreactivity in the myocardium of the ventricle. n = 5.

The myocardium in adult and larval hearts is marked by Phalloidin staining (F-actin, blue). Dashed lines encircle the cryoinjured part in adult (b, c) and the ventricular area in larvae (d, h).

Figure 6

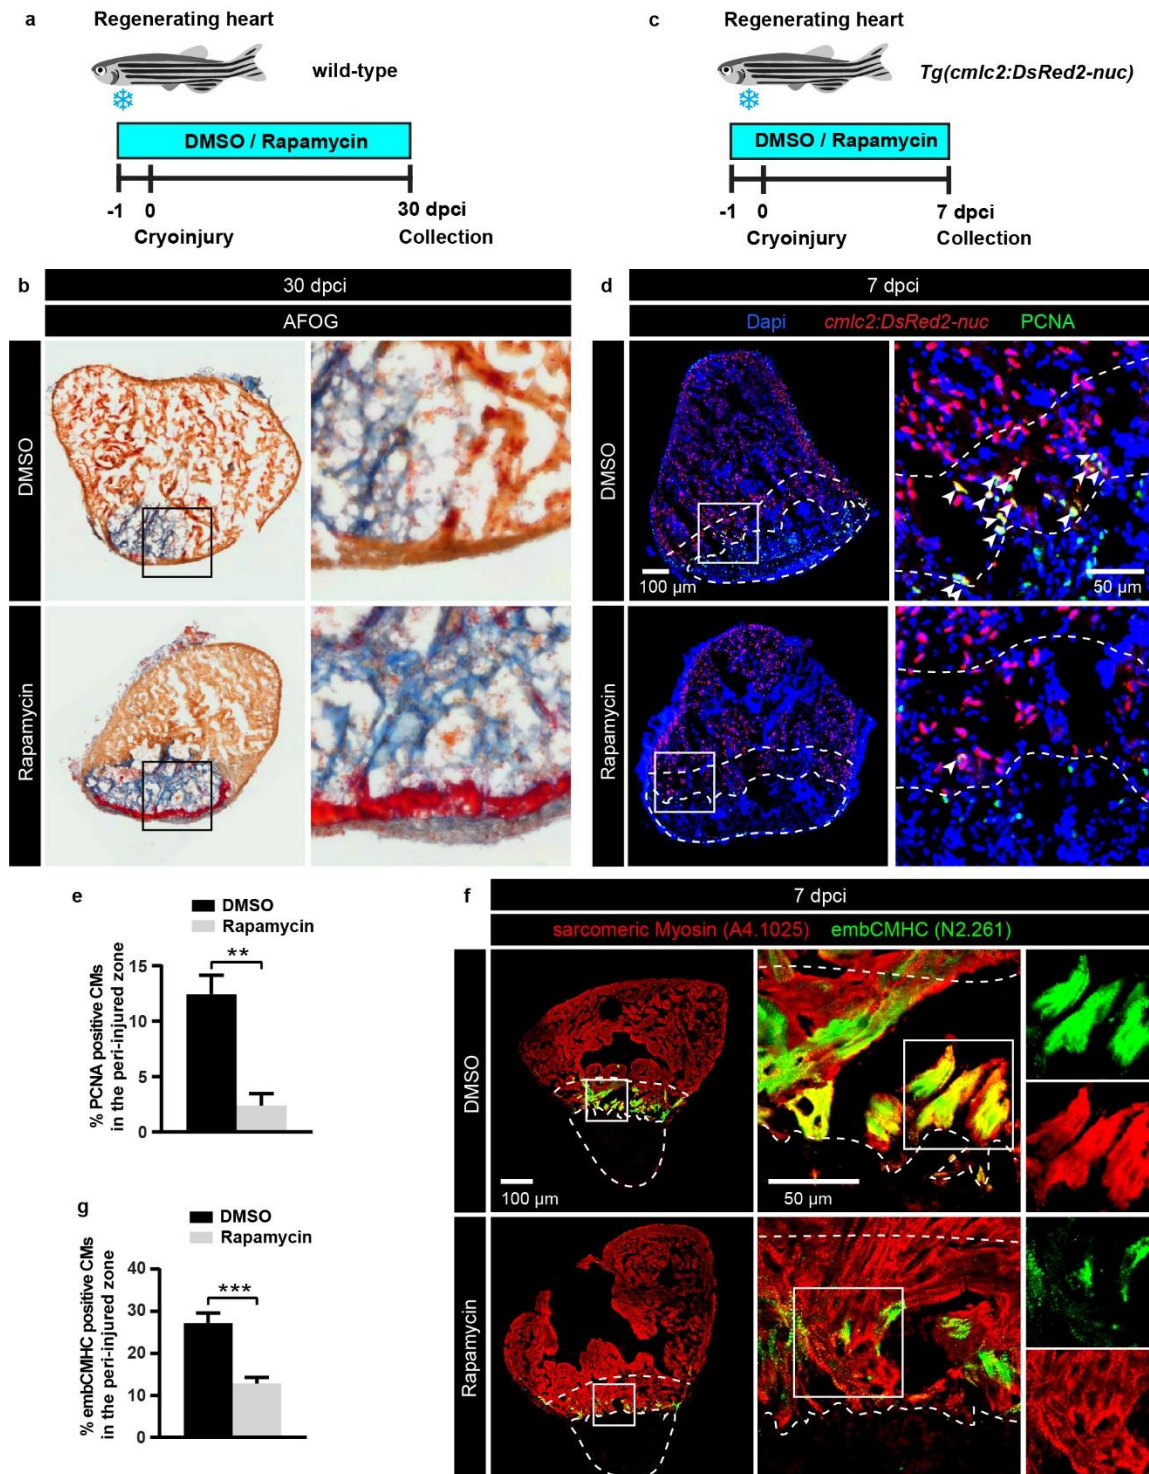

**Figure 6. The rapamycin-mediated inhibition of TOR signaling blocks heart regeneration**  
**a,c**, Experimental design for rapamycin treatment during adult ventricle regeneration. Adult zebrafish were treated with 1  $\mu$ M of Rapamycin or 0.05% DMSO for 1 day before cryoinjury and for 30 days (a) or 7 days post-cryoinjury (c).



- b**, Histological AFOG staining which labels the myocardium (beige), fibrin (red) and collagen (blue) in adult heart sections at 30 dpci after rapamycin treatment. A large collagen-rich fibrotic tissue with a persisting fibrin clot is present in rapamycin-treated hearts compared to DMSO-treated control hearts, where the regeneration process is ongoing. n = 6 (DMSO), n = 5 (Rapamycin).
- d**, Ventricle of transgenic *cmlc2:DsRed2-nuc* fish at 7 dpci immunostained for the cell proliferation marker PCNA. The cryoinjured zone is encircled with a dashed line. Arrows indicate cardiomyocytes triple positive for PCNA (green), DsRed2 (red) and Dapi (blue). Rapamycin treatment markedly reduces cardiomyocyte (CM) proliferation in the peri-injured myocardium within a distance of 100  $\mu$ m from the injury border (delineated with a dashed line).
- e**, Proportion of PCNA-positive cardiac nuclei in the peri-injured myocardium. \*\* P < 0.001, n = 6 (DMSO), n = 5 (Rapamycin).
- f**, Ventricle sections at 7 dpci immunostained with the pan-skeletal myosin antibody A4.1025 (red) and embCMHC (N2.261, green). In DMSO-treated hearts, embCMHC is abundantly expressed in cardiomyocytes located in the peri-injured zone. EmbCMHC immunoreactivity is notably reduced by rapamycin treatment.
- g**, Proportion of embCMHC/A4.1025-double positive area within the A4.1025-labelled myocardium. \*\*\* P < 0.0001, n = 6.

Figure 7

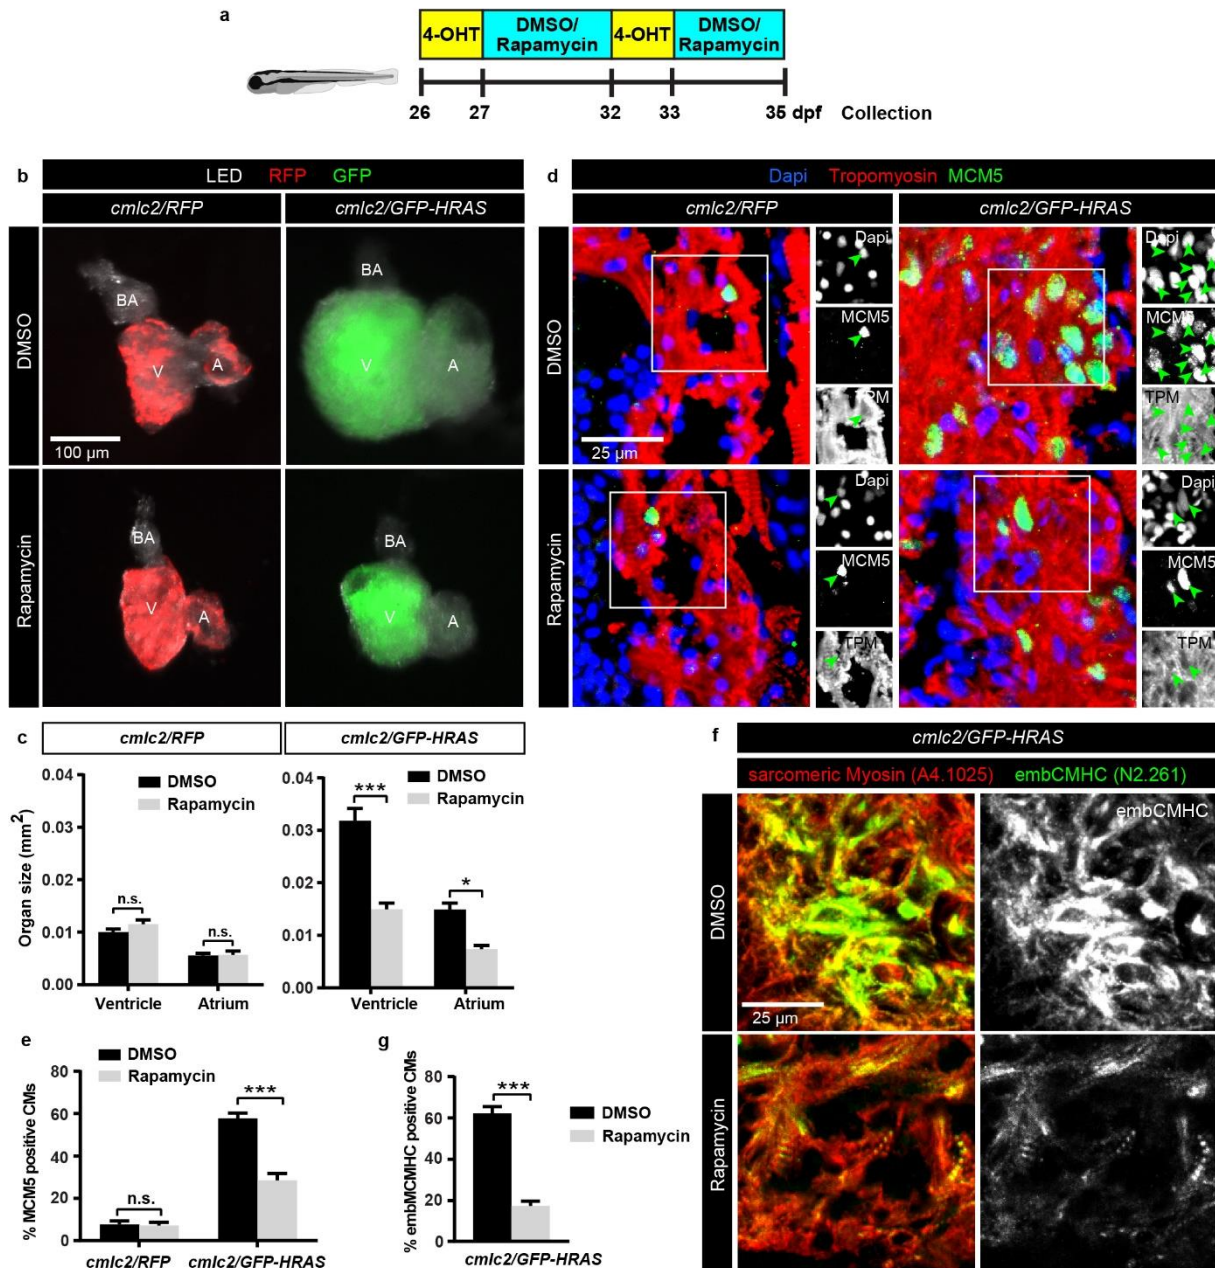

**Figure 7. Rapamycin-mediated inhibition of TOR rescues the detrimental effects of HRAS on cardiomyocytes hyperproliferation and differentiation in larvae.**

**a**, Experimental design for rapamycin treatment after induced cardiac neoplasia in larvae. Larvae were treated with 0.5  $\mu$ M rapamycin or 0.05% DMSO between the 4-OHT pulse treatments.

**b**, Photographs of dissected unfixed hearts illuminated with LED and UV lights with RFP or GFP filters. Fluorescent proteins are induced in the ventricle (V) and atrium (A). Treatment



with rapamycin did not markedly affect the heart size of *cmlc2/RFP* fish, but it reduced the hypergrowth of hearts in *cmlc2/GFP-HRAS* fish.

**c**, Quantification of the ventricular and atrial surface based on photographs of dissected hearts representatively shown in **b**. \*\*  $P > 0.001$ , \*  $P > 0.01$ , n.s.= not significant,  $n = 6$ .

**d**, Immunostaining of heart sections with anti-MCM5 (green) and anti-Tropomyosin (red) antibodies. Proliferating cells of the myocardium were visualized by colocalization between MCM5, Tropomyosin and Dapi (green arrows in the black and white panels).

**e**, Proportion of DAPI/MCM5-positive cells within the Tropomyosin-positive areas of the ventricular section in *cmlc2/RFP* and *cmlc2/GFP-HRAS* larvae. Rapamycin did not affect normal cell proliferation in *cmlc2/RFP* control fish, but it reduced hyperproliferation in *cmlc2/GFP-HRAS* fish. \*\*\*  $P < 0.0001$ ,  $n = 6$ .

**f**, Immunofluorescence staining of heart sections with the pan-skeletal myosin antibody A4.1025 (red) and embCMHC (N2.261, green). The abundant expression of embCMHC upon HRAS transformation is substantially decreased by rapamycin treatment.

**g**, Proportion of embCMHC/A4.1025-double positive area within the A4.1025-labelled myocardium in *cmlc2/GFP-HRAS* larval ventricle. \*\*\*  $P > 0.0001$ ,  $n = 8$ .

Figure 8

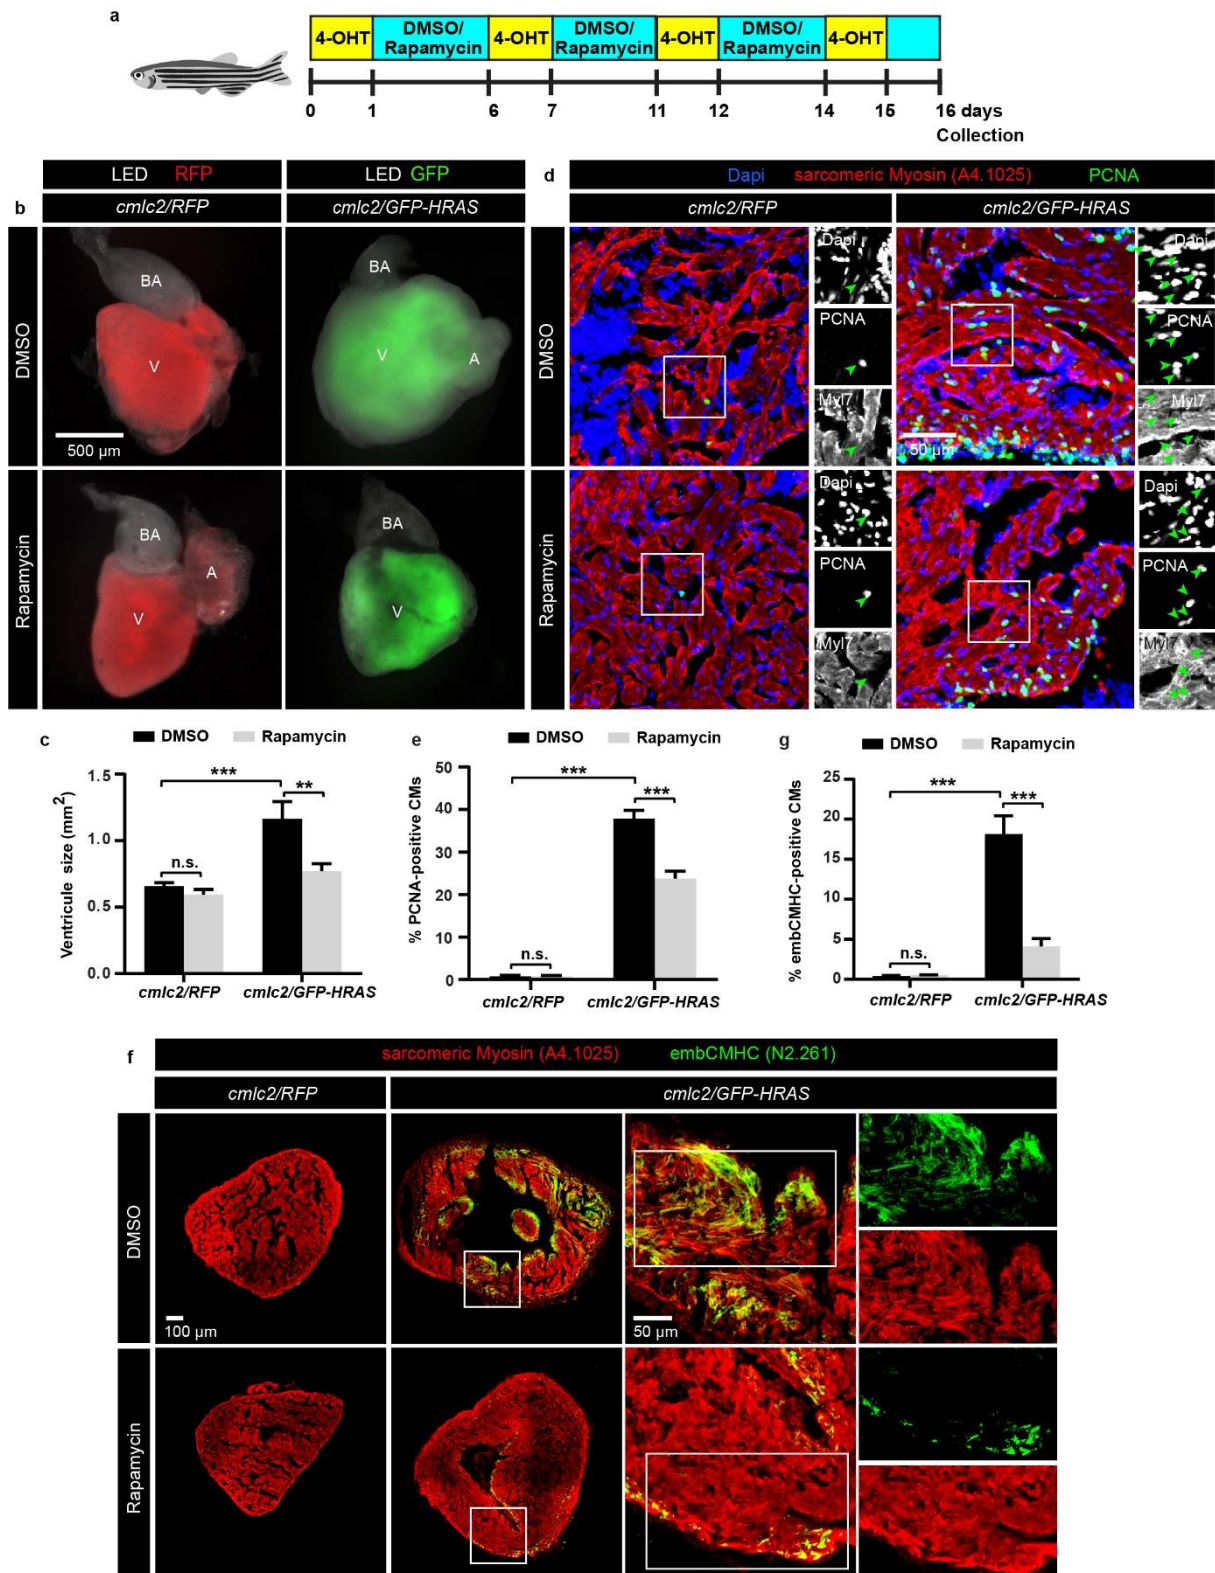

**Figure 8. Rapamycin-mediated inhibition of TOR signaling rescues the HRAS-induced neoplastic growth in adult hearts.**

**a**, Experimental design for rapamycin treatment after induced cardiac neoplasia in adult zebrafish. 6-8 months-old adult zebrafish were treated with 0.5  $\mu$ M rapamycin or 0.05% DMSO between the four 4-OHT pulse treatments.

**b**, Photographs of dissected unfixed hearts illuminated with LED and UV lights with RFP or GFP filters. RFP (red) and GFP (green) fluorescent proteins are induced in the ventricle (V) and atrium (A). Rapamycin treatment noticeably reduces the overgrowth of *cmlc2/GFP-HRAS* ventricles, while it does not affect the heart size of *cmlc2/RFP* fish.

**c**, Quantification of the ventricular surface based on photographs of dissected hearts representatively shown in **b**. \*\*\*  $P > 0.001$ , \*\*  $P > 0.01$ , n.s.= not significant,  $n = 6$ .

**d**, Ventricle sections immunostained for the cell proliferation marker PCNA (green) and the pan-skeletal muscle antibody A4.1025 (red). Proliferating cells of the myocardium were visualized by colocalization between PCNA, A4.1025 and Dapi (green arrows in the black and white panels). Rapamycin treatment markedly reduced the hyperproliferation of cardiomyocytes in *cmlc2/GFP-HRAS* compared to DMSO.

**e**, Proportion of DAPI/PCNA-positive cells within the A4.1025-positive areas of the ventricular sections. \*\*\*  $P > 0.0001$ , n.s., not significant,  $n = 5$ .

**f**, Ventricle sections immunostained for embCMHC (N2.261, green) and the pan-skeletal muscle antibody A4.1025 (red). *cmlc2/RFP* hearts do not express embCMHC in the myocardium, while embCMHC is strongly induced after HRAS transformation. Rapamycin treatment substantially reduced embCMHC immunoreactivity in *cmlc2/GFP-HRAS*.

**g**, Proportion of embCMHC/A4.1025-double positive area within A4.1025-labelled myocardium in *cmlc2/RFP* and *cmlc2/GFP-HRAS* adult ventricle. \*\*\*  $P > 0.0001$ , n.s.= not significant,  $n = 5$ .
